1 **Title Page**

2 **Title:** Identification and Characterization of Stem Cells in Mammalian  
3 Esophageal Stratified Squamous Epithelia

4  
5 **Authors:** Yanan Yang<sup>1,2,§</sup>, Guodong Deng<sup>1,2,§</sup>, Lili Qiao<sup>1,2</sup>, Hui Yuan<sup>1,2</sup>,  
6 Xiaohong Yu<sup>1,2</sup>, Lei Xu<sup>1,2</sup>, Shih-Hsin Lu<sup>1,2,3</sup>, Wei Jiang<sup>1,2,3,\*</sup>, Xiying Yu<sup>1,2,3,\*</sup>

7 **Affiliations:**

8 <sup>1</sup> Department of Etiology and Carcinogenesis, National Cancer Center/National  
9 Clinical Research Center for Cancer/Cancer Hospital, Chinese Academy of  
10 Medical Sciences and Peking Union Medical College, Beijing, 100021, China

11 <sup>2</sup> State Key Laboratory of Molecular Oncology, National Cancer Center/National  
12 Clinical Research Center for Cancer/Cancer Hospital, Chinese Academy of  
13 Medical Sciences and Peking Union Medical College, Beijing, 100021, China

14 <sup>3</sup> Beijing Key Laboratory for Carcinogenesis and Cancer Prevention, National  
15 Cancer Center/National Clinical Research Center for Cancer/Cancer Hospital,  
16 Chinese Academy of Medical Sciences and Peking Union Medical College,  
17 Beijing, 100021, China

18 § These authors contributed equally to this work

19 \*Corresponding authors: Wei Jiang, Email: [wjiang6138@cicams.ac.cn](mailto:wjiang6138@cicams.ac.cn); Xiying  
20 Yu, Email: [yuxiying@cicams.ac.cn](mailto:yuxiying@cicams.ac.cn);

## 21 **Abstract**

22 Somatic stem cells are essential for maintenance of cell proliferation-  
23 differentiation homeostasis in organs. Despite the importance, how the  
24 esophageal epithelium that executes its self-renewal and maintenance remains  
25 elusive. In this study, using 5-bromo-2'-deoxyuridine (BrdU) label-chase in rat  
26 and rat esophageal keratinocyte cell line-derived organoids together with  
27 genome-wide DNA methylation profiling and single-cell RNA sequencing  
28 (scRNA-seq), we identify slow cycling/quiescent stem cell population that  
29 contain high levels of hemidesmosome (HD)'s and low levels of Wnt signaling  
30 localized spatially and randomly at the basal layer of the esophageal epithelium.  
31 Pseudo-time cell trajectory from scRNA-seq indicates that cell fates begin from  
32 quiescent basal cells (the stem cells) of the basal layer that produce  
33 proliferating and/or differentiating cells in the basal layer, which, in turn,  
34 progress into differentiating cells in the suprabasal layer, ultimately transforming  
35 into differentiated keratinocytes in the differentiated layer. Perturbations of HD  
36 component expressions and/or Wnt signaling reduce stem cell in the basal layer  
37 of esophageal keratinocyte organoids, resulting in alterations of organoid  
38 formation rate, size, morphogenesis and proliferation-differentiation  
39 homeostasis. Furthermore, we show that not only high levels of HDs and low  
40 levels of Wnt signaling but also an interplay between HD and Wnt signaling  
41 defined stem cells of the basal layer in the esophageal squamous epithelium.  
42 Hence, HDs and Wnt signaling are the critical determinants for defining stem

43 cells of the basal layer required for proliferation-differentiation homeostasis and  
44 maintenance in the mammalian esophageal squamous epithelium.

45

## 46 **Introduction**

47 The endoderm-derived esophagus in mammals is an important organ of the  
48 digestive system between the oropharynx and the stomach for transporting  
49 ingested foods. The mammalian esophagus initially originates from the anterior  
50 foregut that also gives rise to the respiratory system during embryonic  
51 development. As these organs are specified via a process of respiratory-  
52 esophageal separation (RES), the esophageal epithelium forms a simple  
53 columnar epithelium and then transforms into a stratified multi-layered  
54 epithelium [1-4]. The cellular and molecular mechanisms regulating RES and  
55 the esophageal epithelial morphogenesis during embryonic development have  
56 been extensively studied in recent years[2, 4-9]. However, it is less clear how  
57 the mature esophageal epithelium executes its self-renewal and maintenance  
58 of the proliferation-differentiation homeostasis.

59 Adult stem cells are vital for tissue/organ maintenance. Two models, the  
60 homogeneity and heterogeneity models, are proposed for self-renewal and  
61 maintenance of the proliferation-differentiation homeostasis of the mature  
62 esophageal epithelium[4, 10, 11]. The homogeneity model hypothesizes that  
63 cells in the basal layer consist of one single population that can function as the  
64 stem-like progenitors via the cell division cycle to produce daughter cells. Thus,

65 these cells choose randomly to remain as progenitors or differentiate into  
66 suprabasal cells[12-15]. In contrast, the heterogeneity model offers an  
67 alternative possibility where, like other organs such as colon and stomach with  
68 a simple columnar epithelium or skin with stratified squamous epithelium, the  
69 basal layer of mammalian esophagi has a slow-cycling or quiescent stem cell  
70 subpopulation that can be self-renewal, giving rise to fast-dividing progenitor  
71 cells in the basal layer and/or all other differentiated lineages in the suprabasal  
72 layers and the differentiated layers[11]. In support of this model, asymmetrical  
73 cell division and cells with specific stemness related markers were found in the  
74 basal layers of mammalian esophagi[16-20]. Tissue-reconstitution and  
75 organoid formation indicated that cells isolated with various stemness related  
76 markers from mammalian esophagi could efficiently regenerate a completely  
77 stratified multi-layered squamous epithelium when compared with cells without  
78 these markers [21-24]. As single-cell RNA sequencing (scRNA-seq) pushed  
79 identification of cell populations at single cell resolution, Busslinger et al.,  
80 recently identified a quiescent *Col17a1<sup>high</sup> KRT15<sup>high</sup>* stem/progenitor cell  
81 population from the basal cell layer of human esophagi by scRNA-seq [25].  
82 Hence, an accumulation of evidence supports the heterogeneity of the basal  
83 cells of mammalian esophagi. However, it remains unclear what proportion of  
84 basal cells are the stem cells, where the stem cells are located and how the  
85 stem cells are defined to maintain proliferation-differentiation homeostasis in  
86 the basal layer of the esophageal stratified squamous epithelium.

87 In this report, we show that 4-7% of slow cycling/quiescent basal cells (QBCs)  
88 with the molecular stem characteristics function as the stem cells spatially and  
89 randomly located in the basal layers of rat esophagi and normal rat esophageal  
90 keratinocyte cell line derived organoids. QBCs represent a unique cell  
91 population with unique patterns of DNA methylations and mRNA expressions.  
92 Detailed analyses indicate that high levels of hemidesmosomes (HDs) and low  
93 levels of Wnt signaling could serve as the critical determinants required for the  
94 stem cell maintenance and proliferation-differentiation homeostasis in rat  
95 esophageal stratified squamous epithelia.

96

## 97 **Results**

### 98 **Identification of slow cycling/quiescent basal cells (QBCs) in mammalian** 99 **esophagi**

100 We sought to determine if a stem cell subpopulation could be detected in the  
101 basal layers of the mammalian esophagi. Esophageal tissues from rat, mouse  
102 and human were collected, fixed and stained with hematoxylin-eosin (H&E stain,  
103 S1 Fig A) and various cell markers (S1 Fig B-D). While H&E stain revealed the  
104 typical stratified squamous epithelia in rat, mouse and human esophageal  
105 tissues, the undifferentiated keratinocyte marker, cytokeratin14 (CK14), marked  
106 cells in the basal layer and the differentiated keratinocyte marker, cytokeratin13  
107 (CK13) marked cells in the suprabasal layer and the differentiated layer.  
108 Stemness-related marker, P63, was detected in basal cells but not suparbasal

109 cells in these tissues whereas other stemness-related markers, SOX2, BMI1  
110 and OCT4 and DNA synthesis marker, PCNA, were stained in both basal and  
111 suprabasal cells. Previously, Neurotrophin receptor component P75NTR and  
112 hemidesmosome components integrin  $\alpha 6$  (ITG $\alpha 6$ ) and  $\beta 4$  (ITG $\beta 4$ ) were  
113 indicated as potential stem cell markers of esophageal keratinocytes[18, 21].  
114 Immunofluorescence staining showed that P75NTR, ITG $\alpha 6$  and ITG $\beta 4$  were  
115 clearly detected at cell membranes of basal cells (S1 Fig B and D). While  
116 P75NTR was stained ubiquitously in the basement membranes of basal cells,  
117 ITG $\alpha 6$  and ITG $\beta 4$  staining showed having subtle variations in the basement  
118 membranes of basal cells (S1 Fig B and D). However, quantifications of the  
119 staining intensities of ITG $\alpha 6$  and ITG $\beta 4$  were performed but the results were  
120 inconclusive. In sum, these results indicated that these makers could  
121 distinguish basal and/or suprabasal cells but could not precisely mark stem  
122 cells in mammalian esophagi.

123 Previous studies showed that stem cells in mammalian gastrointestinal track  
124 and skin were represented by a subpopulation of relatively slow-  
125 cycling/quiescent basal cells[26-29]. Long-term 5-Bromo-2'-deoxyuridine (BrdU)  
126 and 5-iodo-2'-deoxyuridine (IdU) label-retaining experiments indicated that  
127 slow-cycling/quiescent basal cells were also existed in the mouse and human  
128 esophageal epithelia[17, 18]. So, we took a shortcut and applied in vivo BrdU  
129 label-chase experiments to identify the potential stem cells in rat esophageal  
130 stratified squamous epithelia. A detailed experimental flowchart was shown in

131 Figure 1A. Sprague-Dawley (SD) rats were given 100 mg/kg BrdU by  
132 intraperitoneal injection and BrdU labeled rat esophageal cross-sections were  
133 obtained at the indicated time points. These sections were stained with anti-  
134 BrdU antibody by immunohistochemistry or immunofluorescence analyses (Fig  
135 1B and S2 Fig A-C). The label-chase experiments showed that BrdU labeled  
136 cells (BrdU+) were identified mainly in the basal layer in short-labeling times  
137 and then detected in the basal layer and the suprabasal layers in long-labeling  
138 times (>48 h). Cell counting indicated that BrdU+ cells in the basal layer  
139 increased gradually and, ultimately, reached to a maximum level at 48 h  
140 labeling time point (Fig 1B and S2 Fig C). Labeling BrdU up to 72-96 h, BrdU+  
141 cells remained at the same level in the basal layer (Fig 1C and S2 Fig C). The  
142 BrdU+ and BrdU- (BrdU unlabeled) cells were ~96% and ~4%, respectively.  
143 Similar results were also obtained from BrdU label-chase experiments in  
144 BALB/c mice (S2 Fig D and F).

145 We determined the cell cycle profiles of BrdU+ and BrdU- cells isolated from  
146 96 h label-chase rat esophagi by fluorescent-activating cell sorting (FACS). The  
147 results demonstrated that, indeed, BrdU+ cells were cycling cells whereas  
148 BrdU- cells were slow-cycling/quiescent cells at the G0/G1 phase of the cell  
149 cycle (Fig 1D). Double staining of BrdU with potential esophageal stemness  
150 markers, cytokeratin 15 (CK15), ITGα6, CD34, or P75NTR, and stemness-  
151 related markers, SOX2, BMI1 or OCT4, revealed that, consistent with the  
152 results shown in Figure S3, the individual cell markers did not specifically and

153 sufficiently mark BrdU+ cycling cells or BrdU- slow cycling/quiescent cells in the  
154 basal layer (S3 Fig B and C). However, we noticed that all BrdU- slow  
155 cycling/quiescent cells in the basal layer were co-expressed the stemness-  
156 related markers SOX2, BMI1 and OCT4 (S3 Fig D and E). We determined the  
157 distribution patterns of BrdU- cells but found that they were randomly located in  
158 the basal layer. Taken together, these results indicated that the basal layer of  
159 the mammalian esophagus contained slow cycling/quiescent basal cells  
160 (QBCs). However, these cells could not be specifically and effectively marked  
161 by current known stemness related markers.

162

### 163 **Determination of QBCs as a unique cell population by genome-wide DNA** 164 **methylation profiling**

165 To further define molecular characteristics of QBCs, we decided to perform  
166 whole genome bisulfite sequencing (WGBS) profiling experiments as  
167 transcriptome analyses could not be done with cells fixed and stained by BrdU  
168 antibody. Rats were labeled with BrdU for 4 days and then esophageal epithelial  
169 cells were sorted into three populations, BrdU-/CK14+, BrdU+/CK14+ and  
170 BrdU+/CK14-, based on BrdU and CK14 antibody staining by FACS (Fig 2A  
171 and S3 Fig A). Consistent with immunostaining results (Fig 1C), BrdU-/CK14+  
172 cells represented about 4% of CK14+ cells, which were consistent with the  
173 immunohistochemistry or immunofluorescence analyses. We renamed BrdU-  
174 /CK14+ cells as QBCs (quiescent basal cells), BrdU+/CK14+ cells as PBCs



175 (proliferating basal cells) and BrdU+/CK14- cells as SPBCs (suprabasal cells).  
176 WGBS profiling showed that overall methylation levels of QBCs, PBCs and  
177 SPBCs of *Rattus norvegicus* were similar, especially at CpG sites, which  
178 covered >70% methylation sites detected (S4 Fig A-C). However, detailed  
179 analyses of the cytosine methylations at non-CpG sites, such as CpHpG sites  
180 and CpHpH sites (H=A, C and T), revealed different results in QBCs, PBCs and  
181 SPBCs. The non-CpG methylations in QBCs were significantly lower than  
182 those in PBCs and SPBCs (Fig 2B). More importantly, although overall  
183 methylation levels of QBCs, PBCs and SPBCs were similar, hierarchical  
184 clustering in the methylation sites based on genomic sequence could clearly  
185 separate QBCs from PBCs and SPBCs, indicating that epigenetic regulations  
186 at DNA levels were distinct in QBCs when compared with those in PBCs and  
187 SPBCs (Fig 2C).

188 We defined differentially methylated regions (DMRs) between QBCs and  
189 PBCs. Consistent with the results obtained from hierarchical clustering (Fig 2C),  
190 heatmaps generated from DMR methylation levels in top-scored gene surround  
191 regions clearly displayed the differences in QBCs and PBCs (S4 Fig D and E).  
192 Gene Ontology (GO) and Kyoto Encyclopedia of Genes and Genomes (KEGG)  
193 enrichment analyses were performed in genes with DMRs. As shown in Fig 2D,  
194 the highly enriched GO terms were mainly associated with biological processes,  
195 such as cell differentiation, regulation of cell shape and regulation of cell  
196 proliferation, etc. The highly enriched KEGG terms were mainly associated with

197 genes involved in regulating focal adhesion, cytoskeletal structure and  
198 regulation, adhesion junction and Wnt signaling pathway (Fig 2E). These  
199 results indicated that even though QBCs and PBCs were spatially closed in the  
200 basal layer of the esophagus, their DNA methylation levels and patterns in  
201 genome, especially in gene surrounding regions that controlled gene  
202 expressions, were different. The epigenetic characteristics at DNA level (DNA  
203 methylations) in QBCs was unique when compared with those of PBCs and  
204 SPBCs, thus representing a cell population located spatiotemporally in the  
205 esophageal basal layer.

206

### 207 **Existence of the QBCs in normal rat esophageal keratinocyte cell line** 208 **derived organoids**

209 Three-dimension (3D) organoid cultures have been demonstrated as a  
210 powerful in vitro system for studying identification, determination, self-renewal  
211 trajectory and maintenance of tissue stem cells, formation and proliferation-  
212 differentiation homeostasis of organ tissues and carcinogenesis [9, 30-32]. To  
213 further characterize QBCs, we generated a human telomere reverse  
214 transcriptase (h-tert) immortalized rat normal esophageal keratinocyte cell line  
215 (RNE-D3, for detail see Experimental procedures). Like rat esophageal primary  
216 epithelial keratinocytes, REN-D3 (D3) cells in Matrigel with conditional culture  
217 medium formed normal and typical esophageal organoids with endodermal  
218 morphological structures including the basal layer, the suprabasal layers and

219 the keratin layer in 10 days (S5 Fig A-C).

220 Similar to rat esophageal stratified squamous epithelia, immunofluorescence  
221 assay showed that CK14, P75NTR, ITG $\alpha$ 6 and ITG $\beta$ 4 were expressed in the  
222 basal layer cells while PCNA, BMI1, SOX2 and OCT4 were expressed in the  
223 basal and suprabasal layer cells and CK13 was expressed in the suprabasal  
224 layer cells and the keratin layer cells in D3 derived organoids (D3-organoids).  
225 These results indicated that D3-organoids could be used as a convenient in  
226 vitro model for esophageal study (S5 Fig D and E).

227 BrdU label-chase experiments were applied to determine if QBCs were  
228 presented in D3-organoids. The concentration of BrdU used in the experiments  
229 were determined as 200  $\mu$ M, which could sufficiently and effectively label cells  
230 but not inhibit DNA synthesis in D3-organoids (S6 Fig A-D). Detailed  
231 experimental flowchart was shown in Figure 3A. Growing D3-organoids from  
232 day 6 to day 9 were labeled with BrdU, respectively, and then the labeled  
233 organoids were collected, fixed and analyzed at day 10. Immunostaining  
234 showed that D3-organoids labelled with BrdU for 1, 2, 3 and 4 days displayed  
235 16%, 42%, 69% and 93% of BrdU<sup>+</sup> cells in the basal layer, respectively (S3 Fig  
236 B and C). To ensure BrdU labeled cells in the basal layers of D3-organoids  
237 reached maximum, we prolonged BrdU labeling time in growing D3-organoids,  
238 starting at day 4 for 6 days (Fig 3D). The results showed that, like the results  
239 obtained from D3-organoids labeled with BrdU for 4 days, BrdU labeling in  
240 growing D3-organoids for 6 days did not further increase BrdU<sup>+</sup> cells in their

241 basal layers. BrdU+ cells were about 93% and BrdU- cells were about 7% in  
242 the basal layer (Fig 3E and F). Hence, BrdU label-chase experiments  
243 demonstrated that, akin to rat esophageal stratified squamous epithelia, D3-  
244 derived normal esophageal organoids also contained QBCs in the basal layer.

245

### 246 **Resolution of QBCs at the single-cell level in rat esophageal organoids**

247 We performed single-cell RNA sequencing (scRNA-seq) in D3-organoids to  
248 identify QBCs with the distinct RNA expression patterns. D3-organoids grown  
249 for 10 days were collected, digested into single-cell suspension, and then  
250 processed for scRNA-seq using the sorting and robot-assisted transcriptome  
251 sequencing (SORT-seq) protocol. The scRNA-seq analysis resulted in  
252 identification of 3413 keratinocytes from D3-organoids that could be classified  
253 into 7 distinct but related subpopulations (Fig 4A). Based on the expression of  
254 known keratinocyte undifferentiation-differentiation markers, *CK14* (also called  
255 *Krt14*) and *CK13* (also called *Krt13*), D3-organoid epithelial cells could be first  
256 categorized as two cell populations, *CK14<sup>high</sup>* population that represented basal  
257 cells and *CK13<sup>high</sup>* population that represented suprabasal cells and  
258 differentiated cells (Fig 4B-D). *CK13<sup>high</sup>* population could be further clustered  
259 into suprabasal cell subpopulation with high levels of *Sox2*, *Bmi1* and *CK5* (also  
260 called *Krt5*) gene expression and differentiated cell subpopulation with high  
261 levels of *Krt78*, *Spr1a*, *Cd24*, and *Cnfn* differentiation-related gene expression  
262 (Fig 4B and 4E). Moreover, *CK14<sup>high</sup>* population could be clustered into 5

263 subpopulations where one subpopulation expressed high levels of the cell cycle  
264 related genes, such as *Ki67*, *Top2A*, *Kif4A*, *Cenpe* and *Cenpf* (Fig 4B and 4E).  
265 Although the other four subpopulations all expressed low levels of the cell cycle  
266 related genes, two of the subpopulations also expressed high levels of  
267 differentiation-related genes, *Notch1*, and Wnt signaling components, *Wnt4*  
268 *and Wnt10a* (Fig 4B and 4E). These two subpopulations could be further  
269 separated based on expression levels of proliferation related gene, *Igfbp3* (Fig  
270 4B and 4E), and ROS (reactive oxygen species) related gene, *Slc7a11* (Fig 4E).  
271 In contrast, the rest of two subpopulations expressed high levels of Wnt  
272 signaling negative regulators, *Senp2* and *Prickle1* and basement membrane  
273 markers, *Col17a1* (also called *Bpag2*), *Dst* (also called *Bpag1*), *Itga6*, *Itgb4* and  
274 *Col7a1* genes (Fig 4B and 4E). However, one subpopulation expressed these  
275 basement membrane markers higher than the other.

276 Based on the results, we named 7 cell subpopulations as QBC1 (quiescent  
277 basal cell subpopulation 1), QBC2 (quiescent basal cell subpopulation 2), PBC  
278 (proliferating basal cell subpopulation), DBC1 (differentiating basal cell  
279 subpopulation 1), DBC2 (differentiating basal cell subpopulation 2), DSC  
280 (differentiating suprabasal cell subpopulation) and DC (differentiated cell  
281 subpopulation) (Fig 4). We focused on QBC1/2 for further analyses where GO  
282 and GSVA (gene set variation analysis) for multi-biological functions were  
283 determined these subpopulations [33, 34]. The results showed that the  
284 significantly enriched GO terms in QBC1/2, especially QBC1, were cell

285 differentiation, regulation of cell shape and regulation of cytoskeletal structure,  
286 such as hemidesmosome (HD) assembly, cell-cell junction, focal adhesion and  
287 microtubule plus-end binding (Fig 5A).

288 GSVA demonstrated that QBC1, QBC2 as well, displayed significant low  
289 expressions in genes that controlled the cell cycle progression, ROS and their  
290 related phosphorylation regulation pathways when compared with other cell  
291 subpopulations, especially PBC (Fig 5B and 5C). GSEA (gene set enrichment  
292 analysis) also indicated that QBC1, significant down-regulated of cell cycle and  
293 oxidative phosphorylation related genes (Fig 5D and 5E). These results  
294 consistent with the cell cycle profiles of QBCs which isolated from rat esophagi  
295 by FACS that we mentioned in Figure 1D. The results also demonstrated that  
296 QBC1/2 with low cell cycle genes expression pattern led to the phenotype of  
297 slow-cycling/quiescent cells at the G0/G1 phase of cell cycle, suggesting that  
298 QBC1/2 identified in scRNA-seq and QBCs identified by BrdU label-chase  
299 experiments represented the same stemness population in the basal layer of  
300 esophagus.

301 Identification of 7 subpopulations from D3-organoids allowed us to perform  
302 pseudo-time cell trajectory and determine evolutions of esophageal epithelial  
303 cell fates during proliferation-differentiation homeostasis. As shown in Figure 5F,  
304 cells in QBC1/2 cells could be positioned as the start points. Pseudo-time cell  
305 trajectory indicated that, as the most stemness subpopulation in esophageal  
306 basal layer, QBC1/2 produced DBC1 and DBC2, which progressed into DSC,

307 ultimately, differentiating into DC or QBC1/2 generated PBC cells that, in turn,  
308 progressed into DSC and finally differentiated into DC cells.

309 In sum, at the single-cell level, we identified 7 subpopulations in rat  
310 esophageal organoids, with individual mRNA expression patterns, 2  
311 subpopulations were in suprabasal layers whereas 5 subpopulations, including  
312 the most stemness subpopulation QBC1/2, were in basal layer, that indicating  
313 the heterogeneity of mammalian stratified squamous epithelium, especially the  
314 basal layer of esophagus.

315

### 316 **High levels of HD components marked QBCs in rat esophageal epithelia** 317 **and organoids**

318 Since QBC1/2 and QBCs represented the same stemness population in the  
319 basal layer of esophagus, we compared the results obtained from scRNA-seq  
320 and WGBS, especially genes identified by scRNA-seq in QBC1/2 and WGBS  
321 in QBCs. The results from two sequencing data showed that QBC1 was  
322 enriched the expressions of HD components (*Itgβ4*, *Col17a1*, *Dst* and *PLEC*),  
323 HD-anchoring extracellular matrix *Lamb3*, and Wnt pathway negative regulator,  
324 *Prickle1* (Fig 4B), while hypomethylated sites were also detected in the  
325 sequences of these genes and/or the surrounding regions in QBCs (S4 Fig E).  
326 Consistent with these results, recent studies showed that the maintenance of  
327 Wnt pathway at low level could facilitate the specification of anterior foregut  
328 endoderm toward the esophageal progenitor cells lineage[9, 31] while

329 COL17A1 was required for skin keratinocyte stem cell maintenance[35]. High  
330 expression of COL17A1 was also identified as a marker of human esophageal  
331 quiescent stem/progenitor cells[5]. Hence, these results suggested that high  
332 levels of HD components and Wnt pathway negative regulators could serve as  
333 prominent markers of QBCs in the basal layer of the esophageal epithelium.

334 To define if HD and Wnt signaling components marked QBCs in the basal  
335 layers of the rat esophagi, we examined their subcellular localizations in the  
336 basal layers of the rat esophageal epithelia and D3-organoids. While HD  
337 components, ITG $\alpha$ 6 and ITG $\beta$ 4, staining showed strong fluorescence in the  
338 basement membranes of basal cells (S1 Fig B and D), another HD component  
339 PLEC and Wnt pathway negative regulator Prickle1 were stained in both basal  
340 and suprabasal cells (S1 Fig E). In contrast, other HD component, COL17A1,  
341 displayed obviously cell staining variations in the basement membranes of  
342 basal cells (S1 Fig E).

343 To determine if COL17A1 marked QBCs, we examined the expression and  
344 subcellular localization of COL17A1 in the basal layers of the esophagi of rats  
345 labeled with BrdU for 4 days. High levels of COL17A1 were detected in QBCs  
346 when compared with those in PBCs of esophageal epithelia tissues (Fig 6A).  
347 Similar results were also obtained in esophageal epithelia D3-organoids  
348 labeled with BrdU for 4 days (Fig 6A). Notably, high levels of DST, another  
349 component of HD, were also detected in QBCs when compared with those in  
350 PBCs (S8 Fig A and B). Thus, these results demonstrated that HD components,



351 COL17A1<sup>high</sup> and DST<sup>high</sup> could be used as prominent markers to mark stem  
352 cells in the basal layer of the esophageal epithelium.

353

354 **Involvements of hemidesmosome (HD) and/or Wnt signaling in stem cell**  
355 **maintenance and proliferation-differentiation homeostasis in rat**  
356 **esophageal organoids**

357 To ascertain that high levels of HD components were not only prominent  
358 markers for stem cells but also involved in regulating stem cell maintenance  
359 and proliferation-differentiation homeostasis in the basal layer of the esophagus,  
360 we perturbed HDs via RNAi depletion in D3 cells and examined organoid  
361 formation in HD depleted D3 cells. We first knocked down expression of  
362 COL17A1 in D3 cells by transduction of lentivirus expressing *Col17a1* shRNA.  
363 Immunoblotting analysis showed that lentivirus expressing *Col17a1* shRNA in  
364 D3 cells could effectively and efficiently ablate endogenous COL17A1  
365 expression (Fig 6B). As shown in Figures 6C-E, when COL17A1 depleted D3  
366 cells and controls were grown in Matrigel with conditional culture medium for  
367 10-12 days and analyzed for organoid formations, ablation of COL17A1  
368 expression in D3 cells significantly affected organoid formations including  
369 inhibition of organoid formation rate, reduction of organoid size, perturbation of  
370 organoid shape and destruction of proliferation-differentiation homeostasis.  
371 Immunofluorescence with anti-CK14 and anti-CK13 antibodies or  
372 immunohistochemistry with H&E stain showed that, when compared with

373 control D3-organoids, COL17A1 depleted D3-organoids grew and developed  
374 aberrantly, forming disorganized stratified epithelia with non-smooth budding  
375 sharps, reduced sizes and abnormal CK14 and CK13 staining (Fig 6F). The  
376 ratio of suprabasal layer cells vs basal layer cells was increased significantly in  
377 COL17A1 depleted D3-organoids when compared with controls, indicating an  
378 imbalance in proliferation-differentiation homeostasis during organoid formation  
379 and growth (Fig 6G). In addition, CK14 positive cells was also increased in  
380 COL17A1 depleted D3-organoids, suggesting that the imbalance homeostasis  
381 might be caused by the insufficient differentiation (Fig 6H). Therefore, we  
382 performed BrdU labeled experiments to measure the QBCs (BrdU- cells) in the  
383 basal layers of COL17A1 depleted D3-organoids. The results showed that,  
384 when compared with 7% of QBCs in D3-organoids labeled with BrdU for 4 days,  
385 the QBCs in COL17A1 depleted D3-organoids were significantly reduced to ~4%  
386 in the basal layer (Fig 6I and 6J). These results demonstrated that COL17A1,  
387 a core component of HD and a QBCs marker, was required for QBC  
388 maintenance and esophageal keratinocyte organoid formation.

389 Next, we ablated another HD component, PLEC, which was not only required  
390 for type I but also required for type II of HD formation, in D3 cells by RNAi and  
391 examined D3-organoid formation[36]. Consistent with results obtained from  
392 COL17A1 depletion, depletion of PLEC resulted in inhibition of the D3-organoid  
393 formation rate, reduction of the organoid size, perturbation of the organoid  
394 shape and disruption of proliferation-differentiation homeostasis (S7 Fig C-G).

395 The QBCs in PLEC depleted D3-organoids were significantly reduced to ~3%  
396 in the basal layer (S7 Fig H and I).

397 We next examined the role of Wnt signaling in regulating QBCs, the stem  
398 cell maintenance and proliferation-differentiation homeostasis in the basal layer  
399 of D3-organoids. Since Wnt activities in organoids were difficult to measure  
400 directly, we performed functional assays to determine whether perturbations of  
401 Wnt activities would affect stem cell maintenance and proliferation-  
402 differentiation homeostasis in the basal cells. To this end, we perturbed Wnt  
403 activities by additions of Wnt pathway inhibitors IWP-2[37, 38] and SFRP-2[39,  
404 40] or activator CHIR99201[41-43] in organoid culture media and examined  
405 organoid formation and morphogenesis. Detailed experimental flowchart was  
406 shown in Figure 7A. Growing D3-organoids at day 6 were treated with BrdU  
407 plus DMSO (control) or BrdU plus Wnt inhibitor, IWP-2 (2 $\mu$ M) or SFRP-2 (5nM),  
408 for additional 4 days and then the organoid morphogenesis and the proportion  
409 of QBCs in the basal layer cells were determined by histochemistry analysis or  
410 immunofluorescence using anti-BrdU antibody. H&E staining showed that  
411 although organoids in control or in Wnt inhibitor treatment obtained at day 10  
412 could differentiate into stratified squamous tissue structures with the basal layer,  
413 the suprabasal layer and the differentiated layer, organoids treated with Wnt  
414 inhibitors were smaller in size than controls (Fig 7B and C). The BrdU label-  
415 chase experiments indicated that, when compared with control, D3 organoids  
416 treated with Wnt inhibitors, IWP-2 and SFRP-2, displayed dramatically

417 increased levels of QBCs cells in the basal layers (~7% in controls vs ~16-18%  
418 in treatment with IWP-2 or SFRP-2) (Fig 7B and D). Consistently, quantitative  
419 RT-PCR (qRT-PCR) analysis of mRNA expressions of Wnt pathway target  
420 genes *Axin2* and *Dvl1* in the basal cells of D3-organoids treated with Wnt  
421 inhibitors or controls, which were isolated by FACS with anti-ITG $\beta$ 4 antibody,  
422 demonstrated that *Axin2* and *Dvl1* expressions were significantly inhibited by  
423 Wnt inhibitor treatments (S7 Fig 7A-C). In contrast, treatment of D3-organoids  
424 with Wnt pathway activator CHIR99201 induced morphologic pre-mature  
425 differentiations of organoids when compared with control determined by H&E  
426 staining (S8 Fig C). Taken together, these results indicated that low levels of  
427 Wnt signaling benefited the maintenance of QBCs in the basal layer, required  
428 for the stem cell maintenance and proliferation-differentiation homeostasis in  
429 the esophageal stratified squamous epithelium.

430 Finally, we explored whether there was a possible cross-talk and/or interplay  
431 between HDs and Wnt signaling in controlling the stem cell maintenance and  
432 proliferation-differentiation homeostasis in the esophageal stratified squamous  
433 epithelium. Therefore, we ablated PLEC expression in D3-organoids and  
434 simultaneously treated the organoids with Wnt inhibitor, IWP2. When compared  
435 with D3-organoids depleted PLEC alone, IWP2 treatment significantly rescued  
436 the amount of QBCs in the basal layer of D3-organoids (Fig 7E and 7F). These  
437 results indicated that not only high levels of HDs and low levels of Wnt signaling  
438 but also a cross-talk and/or interplay between HD and Wnt signaling defined

439 QBCs of the basal layer, which were crucial for the stem cell maintenance and  
440 proliferation-differentiation homeostasis in the mammalian esophageal  
441 epithelium.

442

## 443 **Discussion**

444 Despite of extensive research, identification and determination of stem cells  
445 in the mammalian esophageal epithelia remained controversial[11]. By genetic  
446 means in mouse model system, Doupe et al., showed that the esophageal  
447 epithelium contained a single population of cells that divided stochastically to  
448 generate proliferating and differentiating daughter cells with equal possibility,  
449 thus indicating that a “reserve” slow cycling stem cell pool was not existed in  
450 the esophageal epithelium [13]. However, analyses of the human and mouse  
451 esophageal epithelium by histological and label-retaining analyses  
452 demonstrated existences of asymmetrically dividing, slow cycling stem cells in  
453 the basal layers of the esophageal epithelia[20, 24]. Furthermore, high  
454 expressions of many stemness markers, such as SOX2, ITG $\alpha$ 6 and ITG $\beta$ 4,  
455 were postulated to present in the stem cells of mammalian esophageal stratified  
456 squamous epithelia[21, 23]. Although several studies suggested that high  
457 expressions of these potential stemness markers in esophageal keratinocytes  
458 promoted cell stemness, the results were often inconclusive and controversial,  
459 thus meriting further investigations[4, 11].

460 Promoted by the label-retaining experiments where, in the absence of

461 esophageal stem cell markers, long term (>3 months) tracking DNA  
462 syntheses/cell divisions by BrdU/IdU label-retaining in rodent and human  
463 esophageal stratified squamous epithelial identified slow-cycling/quiescent  
464 stem cell population[19, 24], we decided to take a shortcut by performing label-  
465 chase experiments. The BrdU label-chase experiments presented in this study  
466 thus allow us to quickly and easily demonstrate that the esophageal epithelia in  
467 rats and mice as well as D3-organoids contained the slow cycling/quiescent  
468 basal stem cell population (QBCs) that accounted around 4~7% of total basal  
469 cells in the basal layers. These QBCs/stem cells were spatially and randomly  
470 located in the esophageal epithelial basal layer.

471 Isolation of label (BrdU+) and unlabel (BrdU-) subpopulation from label-  
472 chase experiments in rat with omic analyses demonstrated that hierarchical  
473 clustering in the methylation sites from WGBS could clearly separate QBCs  
474 from PBCs and SPBCs, indicating that although QBCs were spatially and  
475 randomly colocalized with PBCs in the basal layer, QBCs were unique in terms  
476 of epigenetic regulations at DNA methylation levels. These data were in  
477 agreements with previous studies showing that stem cells and differentiation  
478 progeny cells had distinct epigenomic landscapes. DNA Methylation would be  
479 one of the important epigenomic modifications for the stem cell maintenance,  
480 differentiation and reprogramming[44].

481 In contrast to scRNA-seq using esophageal tissues reported recently, which  
482 contained epithelial cells and other types of cells [25, 45], our scRNA-seq using

483 D3-organoids which were composed of only esophageal squamous epithelial  
484 cells enabled us to determine squamous epithelial subpopulations in detail.  
485 These results together with in vivo DNA methylation profiling indicated that  
486 QBCs represented the stem cells with high levels of HDs and low levels of Wnt  
487 signaling in the esophageal stratified squamous epithelia. Among them, QBCs  
488 expressed not only the basal cell markers but also low levels of cell cycle  
489 markers, demonstrating that QBCs represented a group of cells with high levels  
490 of HD components (*Itga6*, *Itgb4*, *Col17a1*, *Dst* and *Plec*) and Wnt pathway  
491 negative regulators (*Senp2* and *Prickle1*) in the esophageal stratified  
492 squamous epithelia. Pseudo-time cell trajectory showed that QBCs in the basal  
493 layer produced proliferating and/or differentiating cells in the basal layer, which,  
494 in turn, progressed into differentiating cells in the suprabasal layer and  
495 ultimately transforming into differentiated keratinocytes in the differentiated  
496 layer. Thus, these results indicated that QBCs represented the stem cells in the  
497 esophageal stratified squamous epithelia.

498 HD components, ITG $\alpha$ 6 and ITG $\beta$ 4, were reported as markers of esophageal  
499 stem cells in previous studies [17, 21, 23]. It was shown that isolated  
500 keratinocytes with SOX2<sup>+</sup>ITG $\beta$ 4<sup>hi</sup>ITG $\alpha$ 6<sup>hi</sup>CD73<sup>low</sup> from the esophagi of mice  
501 could form more and larger organoids when compared with cells with  
502 ITG $\beta$ 4<sup>low</sup>ITG $\alpha$ 6<sup>low</sup> [21]. Using 3D organotypic sphere culture system, cells  
503 isolated from mice with CD49f<sup>+</sup> (also known as ITG $\alpha$ 6) CD24<sup>low</sup>CD71<sup>low</sup> were  
504 shown to enrich esophageal stem cells that could display higher sphere-forming

505 capacity and give rise to differentiated suprabasal cells[23]. Recently, other HD  
506 components, such as COL17A1, were also identified as esophageal epithelial  
507 stem cell maker by other study where the authors showed that stem cells in the  
508 human epithelium expressed high levels of COL17A1[25]. Moreover, studies  
509 showed that high expression of COL17A1 in mouse skin marked epidermal  
510 stem cells. In that study, expression levels of COL17A1 controlled stem cell  
511 competition and orchestrated skin homeostasis and aging[35]. Our results  
512 presented here were not only consistent with these data but also further  
513 demonstrated that perturbation HD components, COL17A1 and PLEC,  
514 inhibited esophageal keratinocyte organoid formation, morphogenesis and  
515 proliferation-differentiation homeostasis. Taken together, the results indicated  
516 that HDs were not only a prominent marker for the stem cells but also involved  
517 in regulating the stem cell maintenance and proliferation-differentiation  
518 homeostasis in the basal layer of the esophagus.

519 Our results also revealed that low levels of Wnt signaling had crucial roles in  
520 stem cell maintenance and proliferation-differentiation homeostasis in the  
521 mammalian esophageal epithelium. Wnt pathway were tightly linked with the  
522 stem cell maintenance and differentiation in multiple mammalian tissues [46,  
523 47]. In intestinal niches, a gradient of Wnt signaling activities were found along  
524 the colonic crypt axis with the highest levels at the crypt bottom to maintain  
525 LGR5+ stem cells [48-52]. LGR5+ cells, resident at position +4 in a niche, had  
526 the lowest level of Wnt signaling than other LGR5+ cells in the niche, thus



527 representing a long-lived, slow cycling/quiescent stem cell population[29, 53,  
528 54]. As our omic results obtained from the scRNA-seq and WGBS pointed to  
529 QBCs that were enriched high expressions of Wnt signaling negative regulators,  
530 we manipulated Wnt signaling in D3-organoids, demonstrating that QBCs of  
531 esophageal epithelium were required low levels of Wnt signaling for their  
532 maintenances.

533 We explored the relationship between HD and Wnt signaling and found that  
534 not only high levels of HDs and low levels of Wnt signaling but also their cross-  
535 talk(s) and/or interplay(s) defined QBCs of the basal layer although the precise  
536 underlying mechanism(s) would be required for further investigations. Based  
537 on these studies, we propose that high levels of HDs (numbers) and low levels  
538 of Wnt signaling controlled, at least in part, by their components/regulators'  
539 expression via epigenetic regulation at DNA level (DNA methylation) and their  
540 cross-talks/interplays at the basal cells define the stem cells, which are quired  
541 for self-renewal, maintenance and proliferation-differentiation homeostasis in  
542 the mammalian esophagus.

543

## 544 **Materials and methods**

### 545 **Cell line and culture conditions**

546 Human telomere reverse transcriptase (h-tert) immortalized rat normal  
547 esophageal epithelial cell line (RNE-D3, D3 for short) was established and  
548 preserved by our laboratory. D3 was cultured in DMEM/F12 (3:1) medium

549 supplemented with 10% fetal bovine serum (Thermo Fisher Scientific), 8 ng/mL  
550 Cholera Toxin (CELL technologies), 5 ng/mL insulin (CELL technologies), 25  
551 ng/mL hydrocortisone (CELL technologies), 0.1 ng/mL EGF (PeproTech) and  
552 10  $\mu$ M Y27632 (Topsience) in a humidified 37°C incubator supplemented with  
553 5% CO<sub>2</sub>. D3-sh*Col17a1* cell lines were constructed by lentivirus transduction  
554 using following sequences: shRNA-1: 5'- GGACCTATCACAACAACATAG-3'.

555 shRNA-2: 5'- GCAGACACATTCTCAACTATA-3'. D3-sh*PLEC* cell lines were  
556 constructed by lentivirus transduction using following sequences: shRNA-1: 5'-  
557 GCACAAGCCCATGCTCATAGACGAATCTATGAGCATGGGCTTGTGC-3'.

558 shRNA-2: 5'- GCGCATTGTGAGCAAGCTACACGAATGTAGCTTGCTCACAATGCGC-3'.

560

### 561 **Organoid culture and in vitro BrdU-labeling**

562 Generation of organoids was performed as described previously[21]. Briefly,  
563 D3 cells, D3-shCOL17A1 cells or D3-shPLEC cells were trypsinized into single  
564 cells and resuspended by ice-cold Matrigel (Corning). A droplet of 50  $\mu$ L cell-  
565 Matrigel mixture was seeded into the bottom central of flat 24-well plates. After  
566 solidification in incubator, 500  $\mu$ L medium of advanced DMEM/F12 (Thermo  
567 Fisher Scientific) supplemented with 1 $\times$ penicillin-streptomycin (Thermo Fisher  
568 Scientific), 1 $\times$ N2 supplement (Thermo Fisher Scientific), 1 $\times$ B27 supplements  
569 (Thermo Fisher Scientific), 10 mM HEPES Buffer (CELL technologies),  
570 1 $\times$ GlutaMAX™ (Thermo Fisher Scientific), 1 mM N-acetyl-L-cysteine (Sigma

571 Aldrich), 100 ng/mL recombinant murine EGF (PeproTech), 100 ng/mL  
572 recombinant murine Noggin (PeproTech), 100 ng/mL recombinant human R-  
573 Spondin1 (R&D Systems) and 10  $\mu$ M Y27632 (Topsience) were added to each  
574 well. Organoids were grown for 10-12 days at 37°C in a CO<sub>2</sub> incubator with the  
575 medium changed every other day. The organoid formation rate (OFR) was  
576 determined by calculating the percentage of the average numbers of organoids  
577 to the cell number initially seeded per well.

578 For BrdU labeling assay, 200  $\mu$ M BrdU (Sigma-Aldrich) was added at 6th to  
579 9th day of organoid culture. After 10 days of culture, organoids were collected  
580 from Matrigel by cell recovery solution (Corning) digestion. For subsequent  
581 BrdU immunofluorescence staining, the collected organoids were fixed in  
582 neutral fixative solution and embedded in OCT for following experiment. For  
583 Wnt inhibition experiment, Wnt inhibitor IWP-2(TOCRIS) and Srfp-2(R&D  
584 Systems) were added with BrdU at the same time on the 6th day of D3-organoid  
585 culture or D3-shPLEC-organoids culture and organoids were collected on the  
586 day 10. Another experiment with Wnt activator was that CHIR-99021(TOCRIS)  
587 was added at the beginning of D3-organoid culture and organoids collection  
588 was on day5, followed by H&E staining.

589

### 590 **Animals and in vivo BrdU-labeling**

591 All procedures involving animals were carried out in accordance with the  
592 standards approved by ethical committee of National Cancer Center/National

593 Clinical Research Center for Cancer/Cancer Hospital, Chinese Academy of  
594 Medical Sciences. Spargue-Dawley (SD) rats and BLAB/C mice, 4-5 weeks old,  
595 were purchased from BEIJING HUAFUKANG BIOSCIENCE COMPANY. Rats  
596 and mice were housed two and five per cage under standard conditions (24°C  
597 ±2°C, 20 relative humidity, 12-h light/dark cycles) and given access to standard  
598 rodent maintenance feed (Keao Xieli Feed, Beijing, China) and water ad libitum.  
599 Hygienic conditions were maintained by weekly cage changes. After completion  
600 of experiments, we sacrificed mice and rats by inhalation of anaesthetics with  
601 CO<sub>2</sub>.

602 The animals were intraperitoneally injected with BrdU of 100 mg/kg body  
603 weight once per 6 hours for 4 days and sacrificed at designed time points. The  
604 entire esophagus was obtained and fixed by 10% formalin overnight, followed  
605 by routine histological processing of H&E and immunohistochemistry staining.  
606 For immunofluorescence, the entire esophagus was fixed by 10% formalin  
607 overnight and dehydrated in 30% sucrose solution. Then the segmented  
608 esophagus was embedded in OCT compound and immediately frozen by liquid  
609 nitrogen to proceed with cryosection.

610

### 611 **Protein extraction and immunoblotting analysis**

612 Cell samples were collected and extracted to obtain proteins according to the  
613 manufacturer's requirements. Immunoblotting was performed as described  
614 previously [55]. The primary antibodies and dilutions were used against

615 COL17A1(Abcam, 1:1000), PLEC (Abcam, 1:1000) and  $\beta$ -actin (Sigma Aldrich,  
616 1:5000), respectively.

617

### 618 **Immunofluorescence**

619 The OCT embedded esophagus tissue or organoids were cut into 5-10  $\mu$ m  
620 sections using cryosection system. The sections were blocked with 10% normal  
621 goat serum (containing 0.2% TritonX-100) for 1 hour followed by incubation with  
622 primary antibodies against BrdU (Abcam, 1:200), BMI1 (Sigma, 1:200), OCT4  
623 (Abcam, 1:200), SOX2 (Abcam, 1:500), Cytokeratin14 (Abcam, 1:1000),  
624 Cytokeratin13 (SantaCruz, 1:500), PCNA (CST, 1:2400), P63 (Abcam, 1:100),  
625 Integrin6 (SantaCruz, 1:500), Integrin $\beta$ 4 (Abcam, 1:100), CD34 (Abcam, 1:100),  
626 P75 (Abcam, 1:50), DST (Affinity Biosciences, 1:200) and COL17A1 (Abcam,  
627 1:200), respectively. Sections were counterstained with DAPI and sealed with  
628 Slowfade Diamond Antifade Mounted solution (ThermoFisher Scientific) for  
629 microscopic observation. The image fluorescence intensity was measured by  
630 Fiji Image J. All the images were converted to 8 Bit grayscale for plot profile  
631 analysis.

632

### 633 **Immunohistochemistry**

634 Paraffin-embedded sections (5-10  $\mu$ m) were deparaffinized and hydrated.  
635 Citrate buffer solution (PH 6.0) was used for microwave antigen retrieval for 10  
636 minutes. Endogenous peroxidase was blocked by 3% hydrogen peroxide

637 solution for 20 minutes. The sections were subsequently blocked with 10% goat  
638 serum for 1 hour and incubation with primary antibody at 4°C overnight,  
639 followed by HRP polymer incubation for 1 hour at room temperature. DAB  
640 solution was used for chromogenic reaction under microscopic observation.  
641 Then the sections were counterstained with Hematoxylin and sealed with  
642 neutral balsam for microscopic observation. The primary antibodies used were  
643 BrdU (SantaCruz, 1:200), Cytokeratin14 (Abcam, 1:5000), Cytokeratin13  
644 (SantaCruz, 1:500) and PCNA (CST, 1:4000).

645

#### 646 **FACS and Cell cycle analysis**

647 Epithelial cells were obtained from rat esophagus as described previously[21].  
648 Then these cells were fixed with 2% paraformaldehyde and then washed by  
649 PBS twice. Cells were penetrated with PBS containing 0.1% TritonX-100 for 5  
650 minutes on ice and washed by PBS for 3 times. DNase I (TaKaRa) was added  
651 to each sample, incubating for 30 minutes at 37°C in the dark. After Washing,  
652 cells were stained with primary antibody anti-rat BrdU (SantaCruz, 1:200) and  
653 anti-rabbit CK14 (Abcam, 1:5000) for 30 minutes at room temperature.  
654 Subsequently, cells were incubated with goat anti-rat Alexa flour® 488 and  
655 donkey anti-rabbit APC (IgG H&L) for 30 mins at room temperature. Then the  
656 BD Flow Sorter was used to sort the BrdU+CK14+, BrdU-CK14+ and  
657 BrdU+CK14- cells. For cell-cycle assay, the final cell pellet was suspended in  
658 400 µl of PBS containing a 1:1000 dilution of propidium iodide (PI) for 30

659 minutes at 37°C protected from light followed by flow cytometry examination.

660 Obtained data were further analyzed by Flowjo software (version 10).

661

## 662 **q-PCR**

663 For q-PCR, total RNA was extracted using the Trizol reagent (Ambion, USA)

664 and reverse-transcribed to complementary DNA using the PrimeScript™ RT

665 Reagent Kit (Takara, Dalian, China). Q-PCR was carried out using the SYBR

666 Premix Ex Taq™ Perfect Real-Time system (Takara). The expression levels

667 were normalized to that of the housekeeping gene GAPDH. The primers were

668 used following sequences: GAPDH\_F: 5'- CATGCCGCCTGGAGAAAC -3';

669 GAPDH\_R:5'- CCCAGGATGCCCTTTAGT -3'; Axin2\_F:5'-

670 GACAGCGAGTTATCCAGCGA -3'; Axin2\_R:5'-

671 GTGGGTTCTCGGGAAGTGAG -3'; Dvl1\_F: 5'-

672 ATGAGGAGGACAACACGAGC -3'; Dvl1\_R:5'- AAGTGGTGCCTCTCCATGTT

673 -3'.

674

## 675 **MethylC-seq library construction, sequencing and data analysis**

676 Samples (BrdU+CK14 +, BrdU-CK14+ and BrdU+CK14- cells) were isolated

677 from the esophagi of rats labeled with BrdU for 4 days as described above.

678 Extracted DNA samples would first be examined for concentration and purity to

679 exclude degradation or contamination. Acegen Bisulfite-Seq Library Prep Kit

680 (Acegen, Cat. No. AG0311) was applied for Whole genome bisulfite sequencing

681 libraries construction according to the manufacturer's instruction. In brief, 1 ng  
682 unmethylated Lambda DNA was mixed with 1  $\mu$ g extracted genomic DNA,  
683 followed by sonication into approximately 200-500 bp fragments. Then the  
684 subsequent end-repaired, 5'-phosphorylation, 3'-dA-tailing and 5-  
685 methylcytosine-modified adapter ligation were performed. After being  
686 processed by bisulfite, PCR was operated for 10 cycles to amplify the DNA  
687 using Illumina 8-bp dual index primers. The constructed WGBS libraries were  
688 then analyzed by Agilent 2100 Bioanalyzer and finally sequenced on Illumina  
689 platforms using a 150 $\times$ 2 paired-end sequencing protocol. Agilent 2100  
690 Bioanalyzer and qPCR was used for analyzing and qualifying the libraries.  
691 Illumina HiSeq X10 platforms with a 150 $\times$ 2 paired-end sequencing method was  
692 used for final sequencing.

693 The FastQC software (version 0.11.7) was used for quality control of the raw  
694 data, and the Trimmomatic software (version 0.36) was used for removal of  
695 adapters and unqualified data. The optimized data was mapped to the Rnor\_6.0  
696 Rattus reference genome using the BSMAP software (version 2.73). Data  
697 available for further analysis should comply with this standard: unique aligned  
698 reads, methylated cytosines with sequence depth coverage  $\geq 5$ . Calculation of  
699 individual cytosine methylation level was performed using the ratio of  
700 sequenced CpG methylated cytosine depth to total CpG cytosine depth.  
701 Differentially Methylated Region (DMR) was established using Metilene  
702 software (version 0.2-7), defining  $\geq 5$  cytosine sites in the candidate region no



703 more than 200bp distance to the neighboring cytosine (30bp for CHH). Average  
704 methylation levels differences of CG-DMR, CHG-DMR and CHH-DMR regions  
705 were all need to  $>0.1$  between different populations. Finally, regions established  
706 as final DMRs should be in accordance with the following principles: 2D KS-test  
707 p-value  $<0.05$ , BH (Benjamini & Hochberg) corrected p-value  $< 0.05$ . To  
708 investigate biological process differences involved in DMR-related genes, Gene  
709 Ontology (GO) enrichment was performed ( $Q \leq 0.05$  was considered  
710 significantly enriched). Next, annotated genes with DMR overlapped on their  
711 gene body or upstream and downstream in 2kb were enriched for Kyoto  
712 Encyclopedia of Genes and Genomes (KEGG) functional analysis.

713

#### 714 **Single-cell RNA sequencing and data processing**

715 D3 organoids were collected from 24-well plate by Cell Recovery Solution  
716 digesting on ice for 2 hours. The deposited organoids were scattered by mixture  
717 digesting solution (containing 1× collagenase I, 1× collagenase IV, and 1×  
718 trypsin), followed by digestion for 30 minutes at 37°C. Then the treated  
719 organoids were centrifuged and resuspended as single-cell solution by PBS  
720 containing 0.04% BSA for further sequencing.

721 Resuspended single cells were embedded into a single-cell gel beads on a  
722 Chromium single cell controller (10× Genomics) with the application of single  
723 cell 3 'Library and Gel Bead Kit V3 (10× Genomics, 1000075) and Chromium  
724 Single Cell B Chip Kit (10× Genomics, 1000074) following the manufacturer's

725 instructions. The wrapped beads containing individual cells, specific barcodes,  
726 UMIs (unique molecular identifiers), cell lysis solution and mixture needed for  
727 reverse transcription. After reverse transcription, obtained cDNA with specific  
728 barcodes and UMIs were mixed together for single-cell RNA-seq library  
729 construction using Single Cell 3' Library and Gel Bead Kit V3. Then the final  
730 sequencing was operated using an Illumina Novaseq6000 sequencer with a  
731 sequencing depth of at least 100,000 reads per cell with pair-end 150 bp  
732 (PE150) reading strategy (performed by CapitalBio Technology, Beijing).

733 FastQC software (version 0.11.2) was used for quality control, and the  
734 obtained data was mapped to the Rnor\_6.0 *Rattus norvegicus* reference  
735 genome using Cell Ranger software (version 4.0.0). Barcode counting, UMI  
736 counting, and cell filtering were performed to achieve feature-barcode matrix  
737 and determine clusters using Cell Ranger software. Exclusion criteria for  
738 abnormal cell when gene number was less than 200, or gene number ranked  
739 in the top 1%, or mitochondrial gene ratio was more than 25%. After UMI  
740 normalization, PCA (Principal Component Analysis) and ten principal  
741 components were used to perform dimension reduction by K-means algorithm  
742 (version 0.17) and graph-based algorithm (version 0.17), respectively.  
743 Visualization was realized by t-SNE dimension reduction analysis (version 0.15).  
744 Then the enrichment analysis was performed using the top 20 marker genes of  
745 each cluster by means of KEGG and GO analysis (KOBAS software). Single-  
746 cell trajectories determined as pseudotime were built with Monocle (version

747 2.4.0). The WGCNA R software package (version 1.51) was used for weighted  
748 correlation network analysis. Sub-clusters would be generated from every  
749 defined cluster according to above clustering result, expression of genes will be  
750 further calculated, and the relative expression level of specific genes were  
751 presented as violin plots. Gene Set Enrichment Analysis (GSEA) was  
752 processed by GSEA software (version 2.2.2.4), which uses predefined gene  
753 sets from the Molecular Signatures Database (MSigDB version 6.2). To further  
754 verify the accuracy of cell cluster definition, GSVA (Gene Set Variation Analysis)  
755 scores for given biological process (including fatty acid metabolism, G2/M cell  
756 cycle, glycolysis, oxidation phosphorylation) and NRF2-regulated redox state  
757 were calculated in each cell cluster using GSVA software (version 1.30.0).  
758 NRF2 regulated gene set including 469 genes were downloaded from GSEA  
759 website (<http://www.gsea-msigdb.org/gsea/msigdb/genesets.jsp?letter=N>).

760

#### 761 **Statistical analysis**

762 Student's t-test and Two-way ANOVA were performed for analyzing statistic  
763 differences between groups, and  $p < 0.05$  was considered of significance. Data  
764 were presented as Mean  $\pm$  SD. GraphPad Prism 7.0 was used for analysis.

765

#### 766 **Study approval**

767 All experiments involving animals were complied with the standards  
768 approved by ethical committee of National Cancer Center/National Clinical

769 Research Center for Cancer/Cancer Hospital, Chinese Academy of Medical  
770 Sciences.

771

## 772 **Acknowledgments**

773 This work was supported by the National Natural Science Foundation of  
774 China (NSFC: 81972572 to WJ), and Chinese Academy of Medical Sciences  
775 (CAMS) Innovation Fund for Medical Sciences (CIFMS) (Grant no.2016-I2M-1-  
776 001 to WJ and S-HL). During this study, Professor Shih-Hsin Lu passed away  
777 in 2019. We all miss him.

778

## 779 **Conflict of interests**

780 The authors declare no competing interests.

781

## 782 **Author contributions**

783 YY and GD contributed to study design, experiment operation, data  
784 interpretation and manuscript writing. LQ, YH, YX and LX contributed  
785 experiment operation and data interpretation: S-HL, WJ and XY contributed  
786 project supervision and data interpretation. WJ and XY contributed manuscript  
787 writing. All authors reviewed and approved the final manuscript.

788

## 789 **References**

790 1. Morrissey, E.E. and A.K. Rustgi, *The Lung and Esophagus: Developmental and Regenerative Overlap*. Trends Cell Biol, 2018. **28**(9):  
791

- 792 p. 738-748.
- 793 2. Que, J., *The initial establishment and epithelial morphogenesis of the*  
794 *esophagus: a new model of tracheal-esophageal separation and*  
795 *transition of simple columnar into stratified squamous epithelium in the*  
796 *developing esophagus*. Wiley Interdiscip Rev Dev Biol, 2015. **4**(4): p.  
797 419-30.
- 798 3. Rosekrans, S.L., et al., *Esophageal development and epithelial*  
799 *homeostasis*. Am J Physiol Gastrointest Liver Physiol, 2015. **309**(4): p.  
800 G216-28.
- 801 4. Zhang, Y., et al., *Development and stem cells of the esophagus*. Semin  
802 Cell Dev Biol, 2017. **66**: p. 25-35.
- 803 5. Getachew, D., et al., *Morphologic changes in the cytoskeleton and*  
804 *adhesion apparatus during the conversion from pseudostratified single*  
805 *columnar to stratified squamous epithelium in the developing mouse*  
806 *esophagus*. Congenit Anom (Kyoto), 2021. **61**(1): p. 14-24.
- 807 6. Jiang, M., et al., *BMP-driven NRF2 activation in esophageal basal cell*  
808 *differentiation and eosinophilic esophagitis*. J Clin Invest, 2015. **125**(4):  
809 p. 1557-68.
- 810 7. Kim, E., et al., *Isl1 Regulation of Nkx2.1 in the Early Foregut Epithelium*  
811 *Is Required for Trachea-Esophageal Separation and Lung Lobation*. Dev  
812 Cell, 2019. **51**(6): p. 675-683 e4.
- 813 8. Yu, W.Y., J.M. Slack, and D. Tosh, *Conversion of columnar to stratified*  
814 *squamous epithelium in the developing mouse oesophagus*. Dev Biol,  
815 2005. **284**(1): p. 157-70.
- 816 9. Zhang, Y., et al., *3D Modeling of Esophageal Development using Human*  
817 *PSC-Derived Basal Progenitors Reveals a Critical Role for Notch*  
818 *Signaling*. Cell Stem Cell, 2018. **23**(4): p. 516-529 e5.
- 819 10. Lin, B., et al., *Basal progenitor cells bridge the development, malignant*  
820 *cancers, and multiple diseases of esophagus*. J Cell Physiol, 2018.  
821 **233**(5): p. 3855-3866.
- 822 11. Zhang, Y., et al., *The development and stem cells of the esophagus*.  
823 Development, 2021. **148**(6).
- 824 12. Alcolea, M.P., et al., *Differentiation imbalance in single oesophageal*  
825 *progenitor cells causes clonal immortalization and field change*. Nat Cell  
826 Biol, 2014. **16**(6): p. 615-22.
- 827 13. Doupe, D.P., et al., *A single progenitor population switches behavior to*  
828 *maintain and repair esophageal epithelium*. Science, 2012. **337**(6098):  
829 p. 1091-3.

- 830 14. Marques-Pereira, J.P. and C.P. Leblond, *MITOSIS AND*  
831 *DIFFERENTIATION IN THE STRATIFIED SQUAMOUS EPITHELIUM*  
832 *OF THE RAT ESOPHAGUS*. Am J Anat, 1965. **117**: p. 73–87.
- 833 15. Piedrafita, G., et al., *A single-progenitor model as the unifying paradigm*  
834 *of epidermal and esophageal epithelial maintenance in mice*. Nat  
835 Commun, 2020. **11**(1): p. 1429.
- 836 16. Barbera, M., et al., *The human squamous oesophagus has widespread*  
837 *capacity for clonal expansion from cells at diverse stages of*  
838 *differentiation*. Gut, 2015. **64**(1): p. 11-9.
- 839 17. Croagh, D., et al., *Identification of candidate murine esophageal stem*  
840 *cells using a combination of cell kinetic studies and cell surface markers*.  
841 Stem Cells, 2007. **25**(2): p. 313-8.
- 842 18. Okumura, T., et al., *Neurotrophin receptor p75(NTR) characterizes*  
843 *human esophageal keratinocyte stem cells in vitro*. Oncogene, 2003.  
844 **22**(26): p. 4017-26.
- 845 19. Pan, Q., et al., *Identification of lineage-uncommitted, long-lived, label-*  
846 *retaining cells in healthy human esophagus and stomach, and in*  
847 *metaplastic esophagus*. Gastroenterology, 2013. **144**(4): p. 761-70.
- 848 20. Seery, J.P. and F.M. Watt, *Asymmetric stem-cell divisions define the*  
849 *architecture of human oesophageal epithelium*. Curr Biol, 2000. **10**(22):  
850 p. 1447-50.
- 851 21. DeWard, A.D., J. Cramer, and E. Lagasse, *Cellular heterogeneity in the*  
852 *mouse esophagus implicates the presence of a nonquiescent epithelial*  
853 *stem cell population*. Cell Rep, 2014. **9**(2): p. 701-11.
- 854 22. Giroux, V., et al., *Long-lived keratin 15+ esophageal progenitor cells*  
855 *contribute to homeostasis and regeneration*. Journal of Clinical  
856 Investigation, 2017. **127**(6): p. 2378-2391.
- 857 23. Jeong, Y., et al., *Identification and genetic manipulation of human and*  
858 *mouse oesophageal stem cells*. Gut, 2016. **65**(7): p. 1077-86.
- 859 24. Kalabis, J., et al., *A subpopulation of mouse esophageal basal cells has*  
860 *properties of stem cells with the capacity for self-renewal and lineage*  
861 *specification*. J Clin Invest, 2008. **118**(12): p. 3860-9.
- 862 25. Busslinger, G.A., et al., *Human gastrointestinal epithelia of the*  
863 *esophagus, stomach, and duodenum resolved at single-cell resolution*.  
864 Cell Rep, 2021. **34**(10): p. 108819.
- 865 26. Buczacki, S.J., et al., *Intestinal label-retaining cells are secretory*  
866 *precursors expressing Lgr5*. Nature, 2013. **495**(7439): p. 65-9.
- 867 27. Mascré, G., et al., *Distinct contribution of stem and progenitor cells to*

- 868 *epidermal maintenance*. Nature, 2012. **489**(7415): p. 257-262.
- 869 28. Roche, K.C., et al., *SOX9 maintains reserve stem cells and preserves*  
870 *radioresistance in mouse small intestine*. Gastroenterology, 2015.  
871 **149**(6): p. 1553-1563 e10.
- 872 29. Sangiorgi, E. and M.R. Capecchi, *Bmi1 is expressed in vivo in intestinal*  
873 *stem cells*. Nat Genet, 2008. **40**(7): p. 915-20.
- 874 30. Kijima, T., et al., *Three-Dimensional Organoids Reveal Therapy*  
875 *Resistance of Esophageal and Oropharyngeal Squamous Cell*  
876 *Carcinoma Cells*. Cell Mol Gastroenterol Hepatol, 2019. **7**(1): p. 73-91.
- 877 31. Trisno, S.L., et al., *Esophageal Organoids from Human Pluripotent Stem*  
878 *Cells Delineate Sox2 Functions during Esophageal Specification*. Cell  
879 Stem Cell, 2018. **23**(4): p. 501-515 e7.
- 880 32. Whelan, K.A., A.B. Muir, and H. Nakagawa, *Esophageal 3D Culture*  
881 *Systems as Modeling Tools in Esophageal Epithelial Pathobiology and*  
882 *Personalized Medicine*. Cell Mol Gastroenterol Hepatol, 2018. **5**(4): p.  
883 461-478.
- 884 33. Hanzelmann, S., R. Castelo, and J. Guinney, *GSVA: gene set variation*  
885 *analysis for microarray and RNA-seq data*. BMC Bioinformatics, 2013.  
886 **14**: p. 7.
- 887 34. Yao, J., et al., *Single-cell transcriptomic analysis in a mouse model*  
888 *deciphers cell transition states in the multistep development of*  
889 *esophageal cancer*. Nat Commun, 2020. **11**(1): p. 3715.
- 890 35. Liu, N., et al., *Stem cell competition orchestrates skin homeostasis and*  
891 *ageing*. Nature, 2019. **568**(7752): p. 344-350.
- 892 36. Walko, G., M.J. Castanon, and G. Wiche, *Molecular architecture and*  
893 *function of the hemidesmosome*. Cell Tissue Res, 2015. **360**(3): p. 529-  
894 44.
- 895 37. Chen, S., et al., *A small molecule that directs differentiation of human*  
896 *ESCs into the pancreatic lineage*. Nat Chem Biol, 2009. **5**(4): p. 258-65.
- 897 38. Chen, B., et al., *Small molecule-mediated disruption of Wnt-dependent*  
898 *signaling in tissue regeneration and cancer*. Nat Chem Biol, 2009. **5**(2):  
899 p. 100-7.
- 900 39. Cruciat, C.M. and C. Niehrs, *Secreted and transmembrane wnt inhibitors*  
901 *and activators*. Cold Spring Harb Perspect Biol, 2013. **5**(3): p. a015081.
- 902 40. Galli, L.M., et al., *Differential inhibition of Wnt-3a by Sfrp-1, Sfrp-2, and*  
903 *Sfrp-3*. Dev Dyn, 2006. **235**(3): p. 681-90.
- 904 41. Sato, N., et al., *Maintenance of pluripotency in human and mouse*  
905 *embryonic stem cells through activation of Wnt signaling by a*

- 906           *pharmacological GSK-3-specific inhibitor*. Nat Med, 2004. **10**(1): p. 55-  
907           63.
- 908   42.   Sineva, G.S. and V.A. Pospelov, *Inhibition of GSK3beta enhances both*  
909           *adhesive and signalling activities of beta-catenin in mouse embryonic*  
910           *stem cells*. Biol Cell, 2010. **102**(10): p. 549-60.
- 911   43.   Wray, J., et al., *Inhibition of glycogen synthase kinase-3 alleviates Tcf3*  
912           *repression of the pluripotency network and increases embryonic stem*  
913           *cell resistance to differentiation*. Nat Cell Biol, 2011. **13**(7): p. 838-45.
- 914   44.   Suelves, M., et al., *DNA methylation dynamics in cellular commitment*  
915           *and differentiation*. Brief Funct Genomics, 2016. **15**(6): p. 443-453.
- 916   45.   Madisson, E., et al., *scRNA-seq assessment of the human lung, spleen,*  
917           *and esophagus tissue stability after cold preservation*. Genome Biol,  
918           2019. **21**(1): p. 1.
- 919   46.   Steinhart, Z. and S. Angers, *Wnt signaling in development and tissue*  
920           *homeostasis*. Development, 2018. **145**(11).
- 921   47.   Taciak, B., et al., *Wnt signaling pathway in development and cancer*. J  
922           Physiol Pharmacol, 2018. **69**(2).
- 923   48.   Farin, H.F., et al., *Visualization of a short-range Wnt gradient in the*  
924           *intestinal stem-cell niche*. Nature, 2016. **530**(7590): p. 340-3.
- 925   49.   Gehart, H. and H. Clevers, *Tales from the crypt: new insights into*  
926           *intestinal stem cells*. Nat Rev Gastroenterol Hepatol, 2019. **16**(1): p. 19-  
927           34.
- 928   50.   Kabiri, Z., et al., *Stroma provides an intestinal stem cell niche in the*  
929           *absence of epithelial Wnts*. Development, 2014. **141**(11): p. 2206-15.
- 930   51.   Leedham, S.J., et al., *A basal gradient of Wnt and stem-cell number*  
931           *influences regional tumour distribution in human and mouse intestinal*  
932           *tracts*. Gut, 2013. **62**(1): p. 83-93.
- 933   52.   Tian, A., et al., *Essential long-range action of Wingless/Wnt in adult*  
934           *intestinal compartmentalization*. PLoS Genet, 2019. **15**(6): p. e1008111.
- 935   53.   Montgomery, R.K., et al., *Mouse telomerase reverse transcriptase*  
936           *(mTert) expression marks slowly cycling intestinal stem cells*. Proc Natl  
937           Acad Sci U S A, 2011. **108**(1): p. 179-84.
- 938   54.   Munoz, J., et al., *The Lgr5 intestinal stem cell signature: robust*  
939           *expression of proposed quiescent '+4' cell markers*. EMBO J, 2012.  
940           **31**(14): p. 3079-91.
- 941   55.   Li, L.W., et al., *Expression of esophageal cancer related gene 4*  
942           *(ECRG4), a novel tumor suppressor gene, in esophageal cancer and its*  
943           *inhibitory effect on the tumor growth in vitro and in vivo*. Int J Cancer,



944 2009. 125(7): p. 1505-13.

945

946 **Figures**

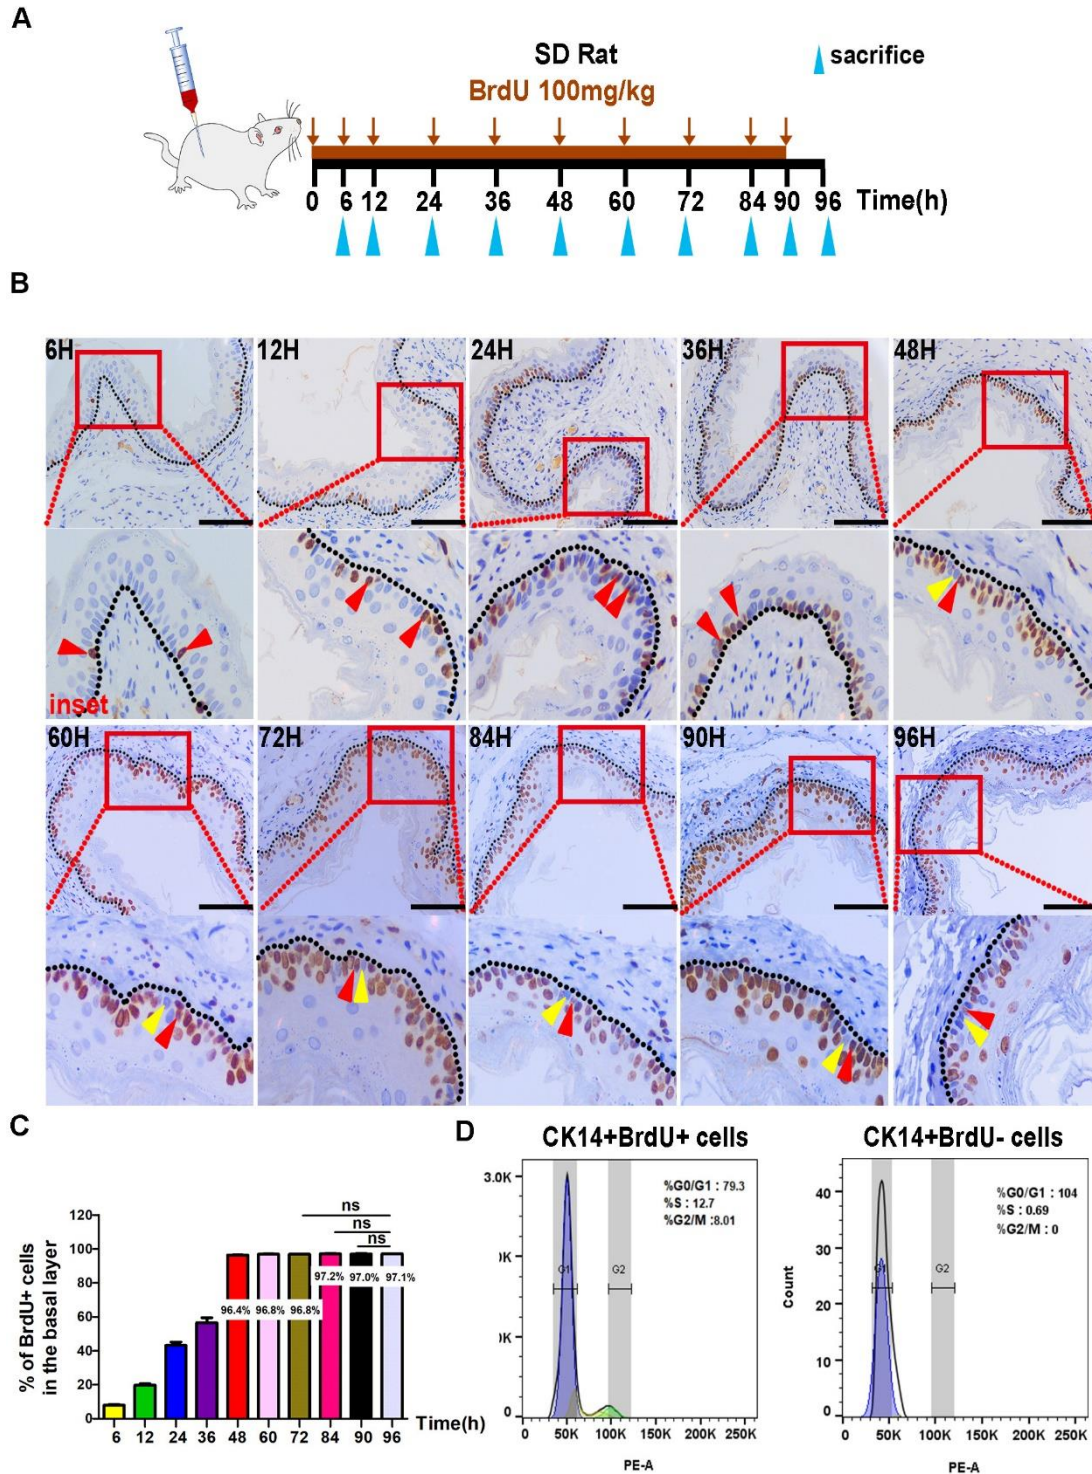

947

948 **Figure 1. Rat esophageal basal layer exists a small relatively slow**

949 **cycling/quiescent cell population. (A) Schematic illustration of BrdU-labeling**

950 experiment. SD rats were injected with BrdU of 100 mg/kg body weight once  
951 per 6 hours for 4 days and sacrificed at designed time points. (B)  
952 Immunohistochemistry staining of BrdU of the esophageal sections at designed  
953 time points. Red triangles indicate BrdU+ cells; the yellow triangles indicate  
954 BrdU- cells. Bottom panels represent the magnification of the interest regions  
955 indicated by a red rectangle of the top panels. (C) The percentage of BrdU+  
956 cells in the basal layer of rat esophageal epithelium at designed time points.  
957 (n=5, n represents 5 intact basal layers of esophageal epithelium counted at  
958 each time point). (D) Cell cycle profile experiment of BrdU+ cells and BrdU-  
959 cells in the basal layer from 96 h label-chase rat esophagi by fluorescent-  
960 activating cell sorting (FACS). Dotted line marks the basement membrane.  
961 Scale bars: 100  $\mu$ m. Data are represented as the mean +/- SD for percent  
962 analysis (\*p < 0.05, \*\*p < 0.01, \*\*\*p < 0.001)

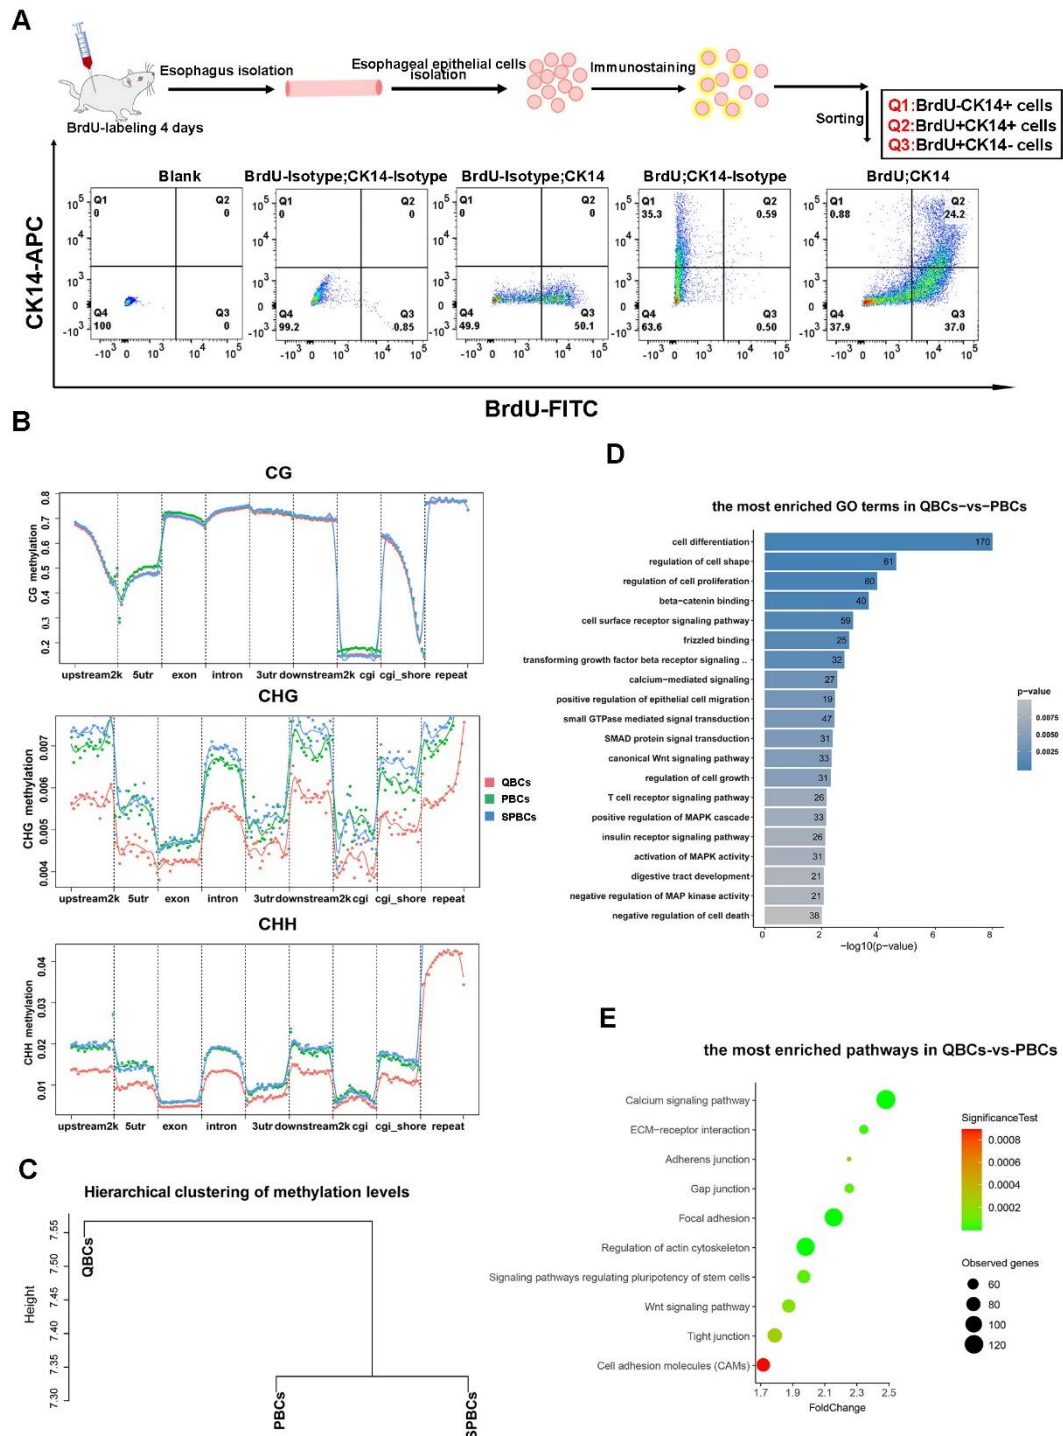

963

964 **Figure 2. Quiescent basal cells (QBCs) population in the rat esophageal**

965 **basal layer have a distinct methylation profile. (A) Three populations, BrdU-**

966 **CK14+/quiescent basal cells (QBCs), BrdU+CK14+/proliferating basal cells**

967 **(PBCs) and BrdU+CK14-/suprabasal proliferating cells (SPBCs), were sorted**

968 **from the esophageal keratinocytes of SD Rats with BrdU-labeling for 96 hours.**

969 (B) Clustering analysis of CpG, CpHpG and CpHpH (H=A, C and T) methylation  
 970 levels among three populations. (C) Hierarchical clustering in the methylation  
 971 maps among three populations. (D) Histogram showing the most enriched GO  
 972 term in QBCs-vs-PBCs. (E) Bubble plot showing the most enriched KEGG  
 973 pathways in QBCs-vs-PBCs.

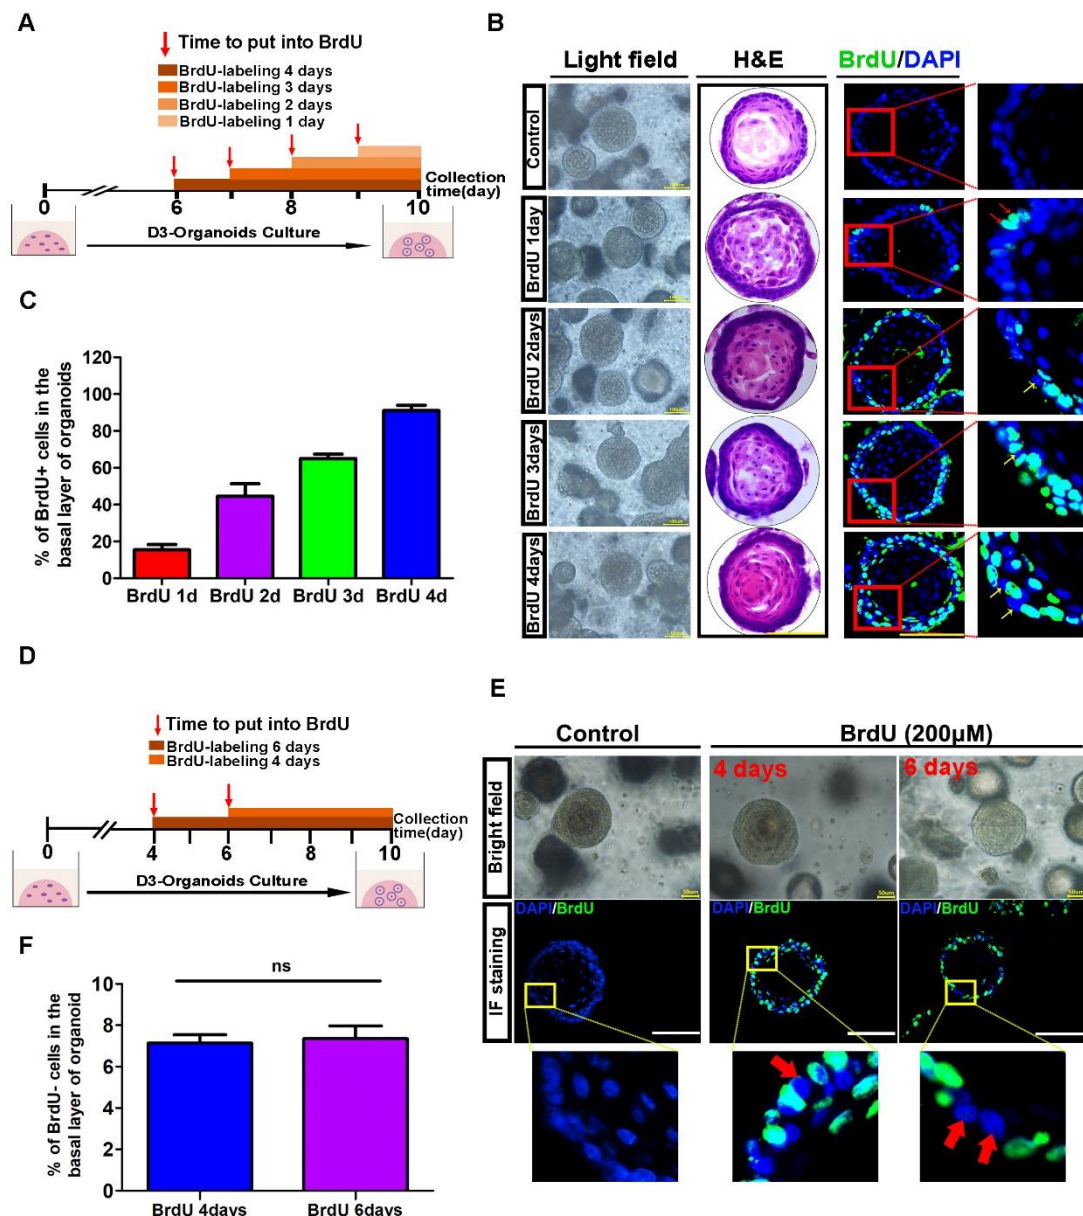

974

975 **Figure 3. The basal layer of rat esophageal organoids derived from D3**

976 **cells also exists quiescent basal cells (QBCs) population. (A) Schematic**

977 illustration of BrdU-labeling experiment of rat esophageal organoids derived  
978 from immortalized normal esophageal keratinocyte cell line D3. 200 $\mu$ M of BrdU  
979 concentration was used at different time points in the organoid culture process.  
980 (B) The representative images of light field, HE staining and corresponding  
981 BrdU immunofluorescence staining of D3-organoids culturing at different BrdU  
982 labeling days. (C) The percentage of BrdU+ cells in the basal layer of D3-  
983 organoids culturing in different BrdU labeling days. (n=9, n presents nine  
984 random microscope fields, 400x). (D) Schematic illustration of BrdU-labeling at  
985 4 days and 6 days of D3-organoid culture. (E) The representative images of  
986 light field and immunofluorescence staining of BrdU of D3-organoids for BrdU-  
987 labeling at 4 and 6 days. Red arrows indicate BrdU- cells in the basal layer of  
988 D3-organoids. (F) The percentage of BrdU- cells in the basal layer of D3-  
989 organoids at BrdU labeling 4 and 6 days. (n=9, n presents nine random  
990 microscope fields, 400x). Scale bars: 100 $\mu$ m. Data are represented as the  
991 mean +/- SD for percent analysis (\*p <0.05, \*\*p < 0.01, \*\*\*p < 0.001).

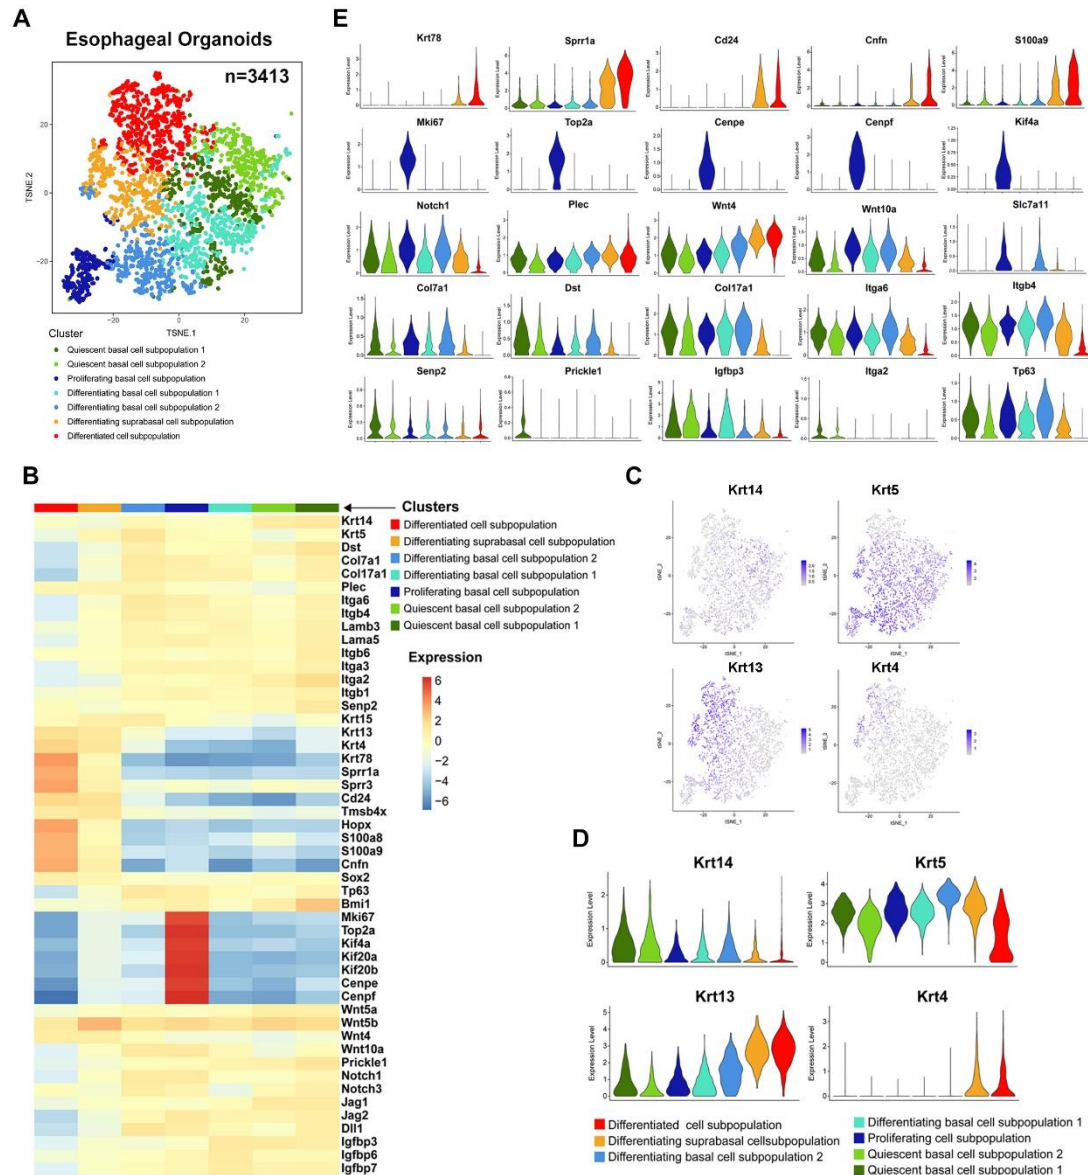

992

993 **Figure 4. Single cell RNA sequencing analysis of rat esophageal**

994 **organoids derived from D3 cells. (A) t-SNE plot displaying the scRNA-seq**

995 **data of rat D3-organoids. Different colors indicated the distinct cell**

996 **subpopulations. (B) Heatmap showing the selected genes expression from the**

997 **7 clusters corresponding to the subpopulations of D3-organoids. (C) UMAP**

998 **plots of Keratin genes expression among the 7 different subpopulations of D3-**

999 **organoids. (D) Violin plots of Keratin genes expression among the 7 different**

1000 **subpopulations of D3-organoids. The y-axis represents the expression level of**

1001 genes, and the x-axis represents different subpopulations. (E) Violin plots of  
 1002 selected genes expression levels among 7 different subpopulations.  
 1003

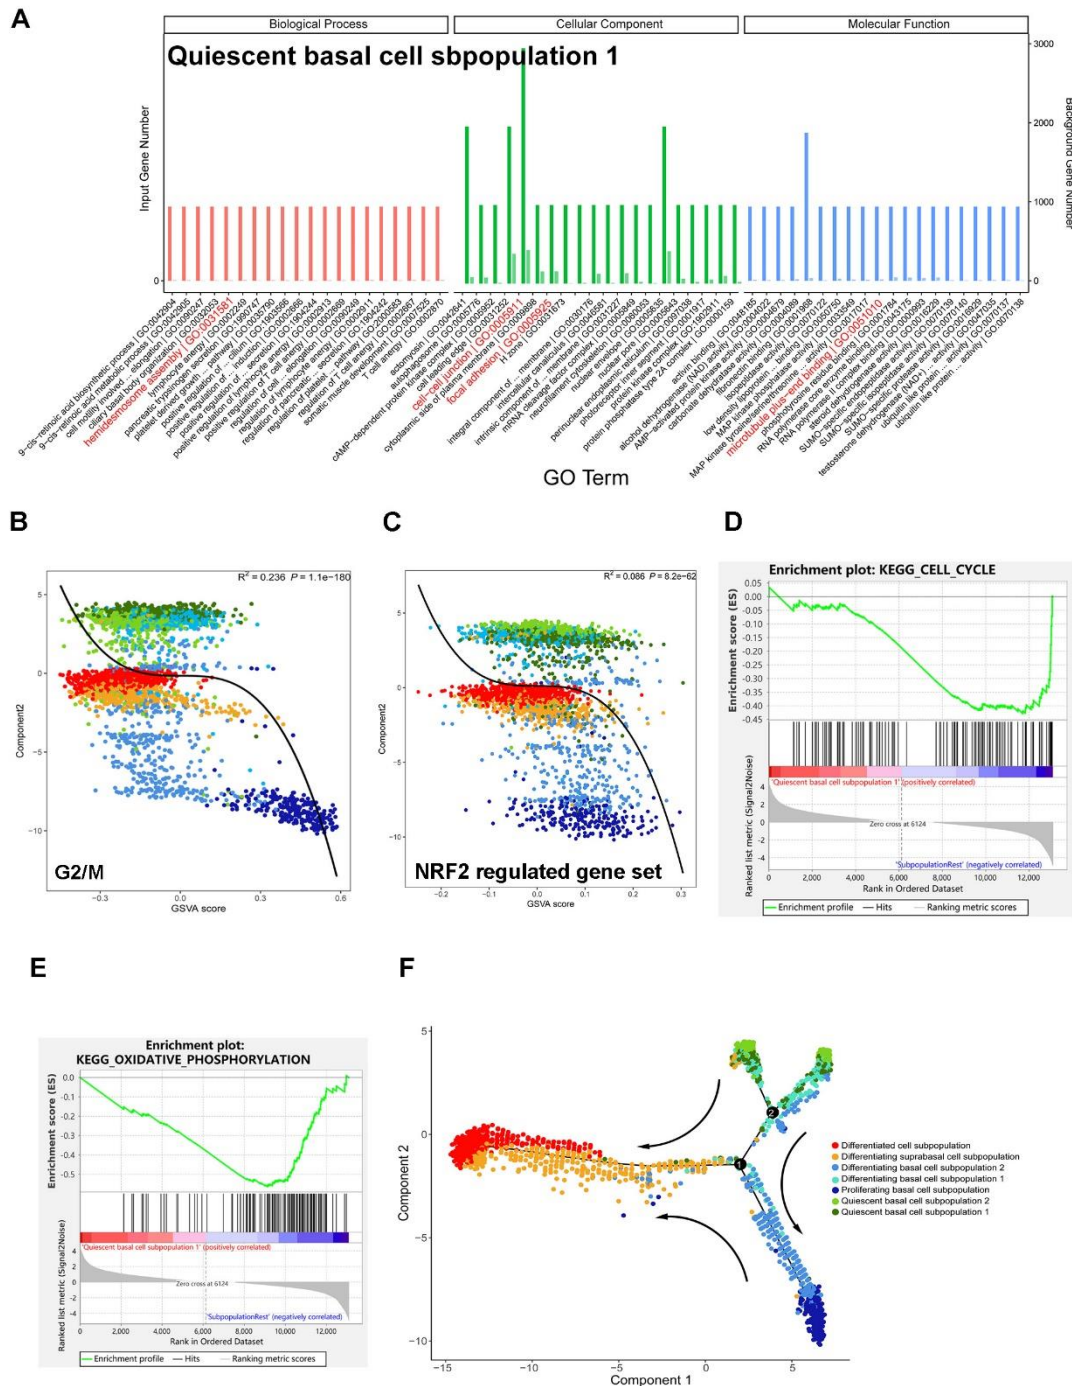

1004

1005 **Figure 5. Detailed signatures of QBC1 of single cell RNA sequencing**

1006 **analysis. (A) GO enrichment analysis in QBC1 (quiescent basal cell**

1007 subpopulation 1) showed significant upregulation of hemidesmosome  
1008 component, in accordance with related cell adhesion and cytoskeleton change.  
1009 (B) GSVA of genes that controlled the cell cycle progression in 7 different  
1010 subpopulations of D3-organoids. (C) GSVA of Nrf2 regulated gene set in 7  
1011 different subpopulations of D3-organoids. (D) And (E) GSEA showed significant  
1012 downregulation of cell cycle regulating genes (upper panel) and oxidative  
1013 phosphorylation regulating genes (lower panel) in QBC1 (quiescent basal cell  
1014 subpopulation 1). (F) Pseudotime trajectory ordered 7 different subpopulations  
1015 of D3-organoids in a two-dimensional state-space. The x and y axes are two  
1016 principal components. The numbers in the black circles represent nodes that  
1017 determine different cell states in the trajectory analysis. The black arrows  
1018 indicate the evolutions of cell fates.



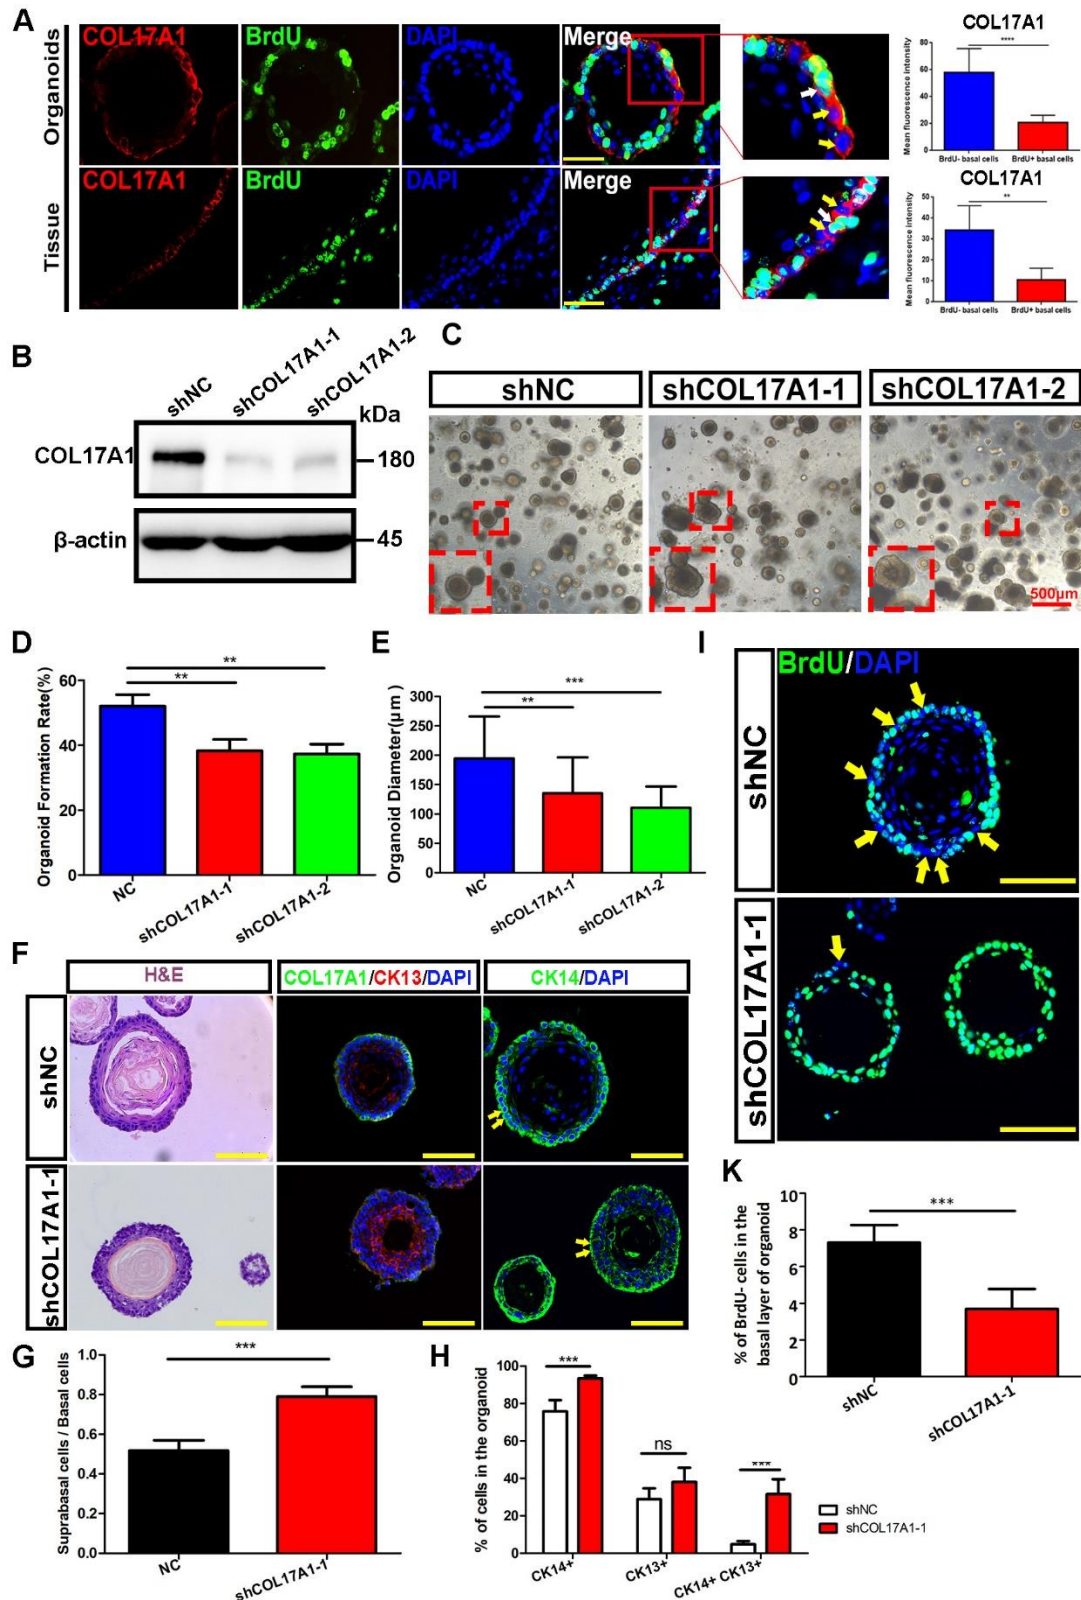

1019

1020

1021

1022

**Figure 6. Hemidesmosome (HD) component, COL17A1, in stem cell maintenance and proliferation-differentiation homeostasis of rat esophagus and organoids.** (A) COL17A1 expression were significantly higher

1023 in BrdU- basal cells than that in BrdU+ basal cells in D3 organoids and  
1024 esophageal tissue. White arrow and yellow arrow stand for representative  
1025 BrdU+ and BrdU- basal cells with COL17A1 expression discrepancies,  
1026 respectively. Histograms on the right panel displayed quantifications of  
1027 COL17A1 florescence intensity using Fiji ImageJ. Scale bars: 50 $\mu$ m. (B)  
1028 Western Blotting verification of D3-sh*Col17a1* cell line construction. (C) The  
1029 representative images of light field of organoids at day 10. COL17A1  
1030 knockdown significantly inhibited organoid formation and growth. Scale bars:  
1031 500 $\mu$ m. (D) Quantification of organoid formation rate after COL17A1  
1032 knockdown. (E) Quantification of organoid diameter after COL17A1 knockdown.  
1033 (F) H&E staining and immunofluorescence staining of intermediate filaments  
1034 (CK13 and CK14) of organoids showed significant self-organization  
1035 perturbation presented as uneven basal layers and abnormal distribution of  
1036 CKs after COL17A1 knockdown. (G) The ratio of suprabasal cells vs. basal cells  
1037 of D3-organoids after COL17A1 knockdown. (n=5, n presents six random  
1038 microscope fields,400X). (H) The percentage of CK14+ cells、CK13+ cells and  
1039 CK14+CK13+ cells of D3-organoids after COL17A1 knockdown. (n=5, n  
1040 presents six random microscope fields,400X). I) Immunofluorescence staining  
1041 of BrdU of D3-organoids labeled for 4 days after COL17A1 knockdown. The  
1042 yellow arrows indicated the BrdU- cells. Scale bars: 100 $\mu$ m. (J) The percentage  
1043 of BrdU- cells in the basal layer of D3-organoids after COL17A1 knockdown.  
1044 (n=6, n presents six random microscope fields,200X). Data are represented as

1045 the mean +/- SD for percent analysis (\*p < 0.05, \*\*p < 0.01, \*\*\*p < 0.001).

1046

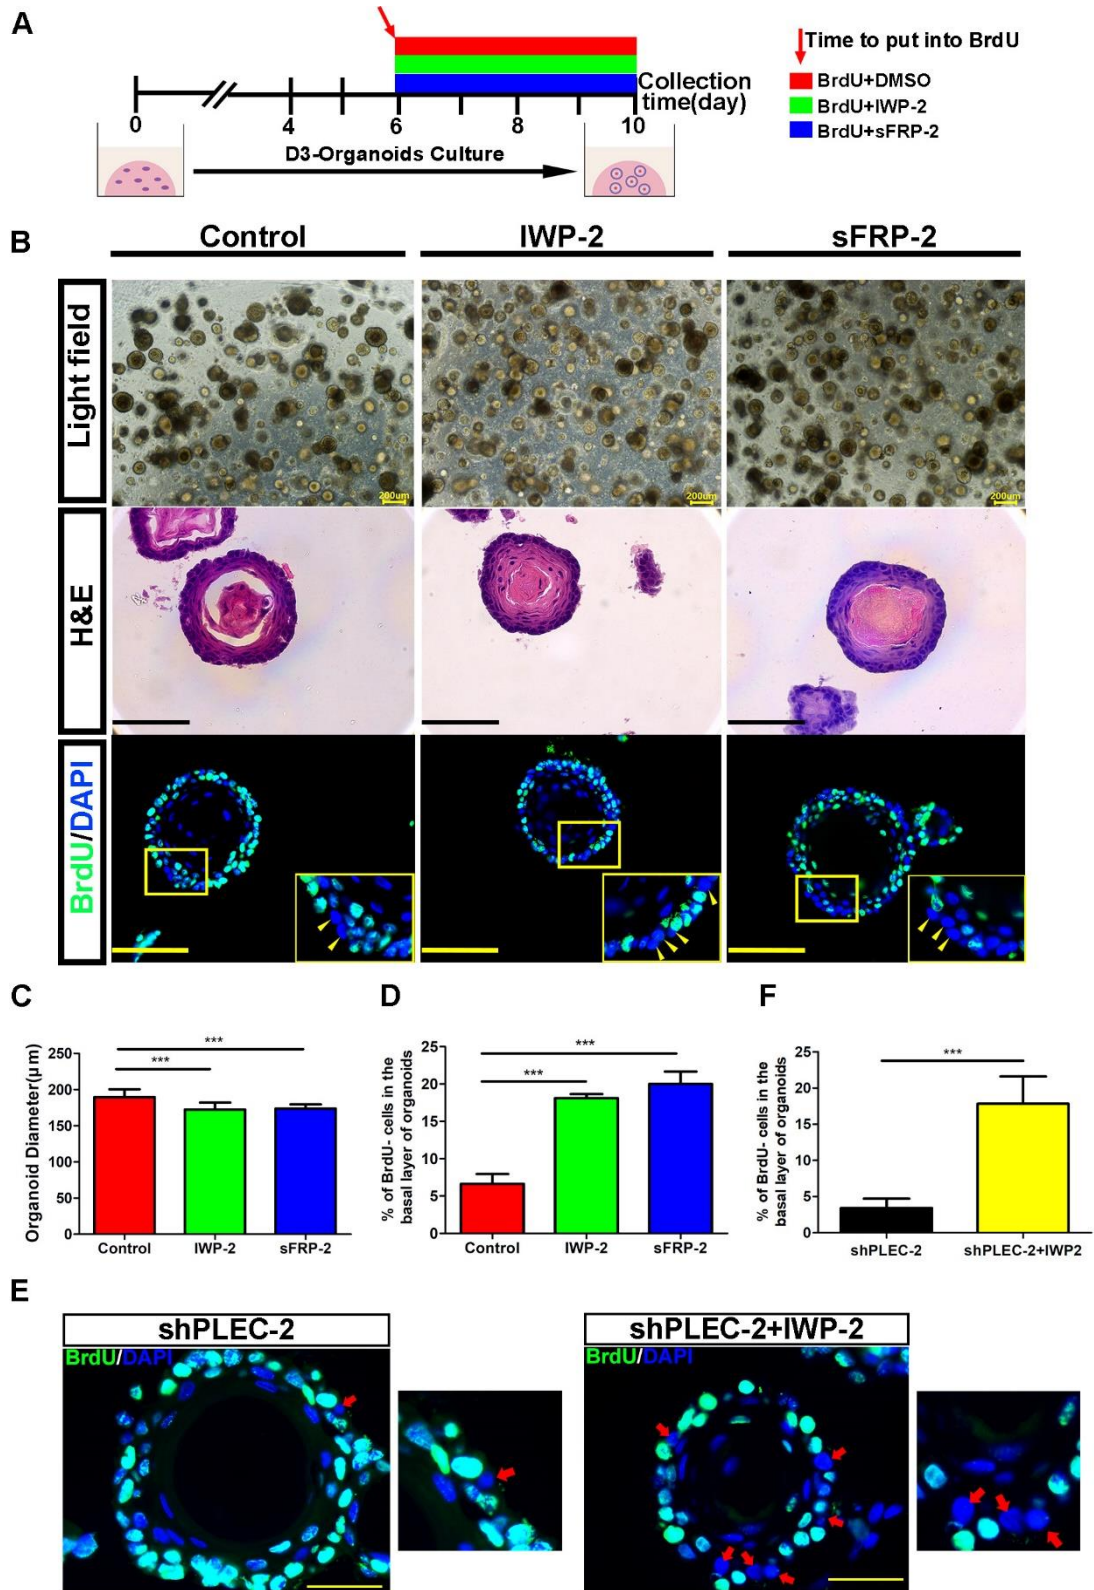

1047

1048 **Figure 7. Wnt signaling-HD crosstalk can maintain the stem cell identity**

1049 **of quiescent basal cells in esophageal organoids.** (A) Wnt inhibitors IWP-2  
1050 and sFRP-2 were added on the 6th day of esophageal organoid culture and  
1051 BrdU-labeling experiment was performed at the same time. 200 $\mu$ mol BrdU,  
1052 2 $\mu$ mol IWP-2 and 5nmol sFRP-2 were used. (B) The images of light field, HE  
1053 staining and corresponding BrdU immunofluorescence staining in (A). (C) The  
1054 diameters of esophageal organoids in the groups with Wnt inhibitors IWP-2 and  
1055 sFRP-2. (n=5, n presents five random microscope fields,200x). (D) The  
1056 percentage of BrdU- cells in the outmost basal layer of esophageal organoids  
1057 in the groups with Wnt inhibitors IWP-2 and sFRP-2. (n=10, n presents ten  
1058 random microscope fields,400x). (E) Immunofluorescence staining of BrdU of  
1059 D3-organoids after PLEC knockdown or/and treated with Wnt inhibitor IWP2 for  
1060 4 days. Scale bars: 100 $\mu$ m. (F) The percentage of BrdU- cells in the basal layer  
1061 of D3-organoids after PLEC knockdown or/and treated with Wnt inhibitor IWP-  
1062 2 for 4 days. (n=6, n presents six random microscope fields,400X). Data are  
1063 represented as the mean +/- SD for percent analysis (\*p < 0.05, \*\*p < 0.01,  
1064 \*\*\*p< 0.001).

1065

1066

1067

1068

1069

1070

1071 **Supporting information**

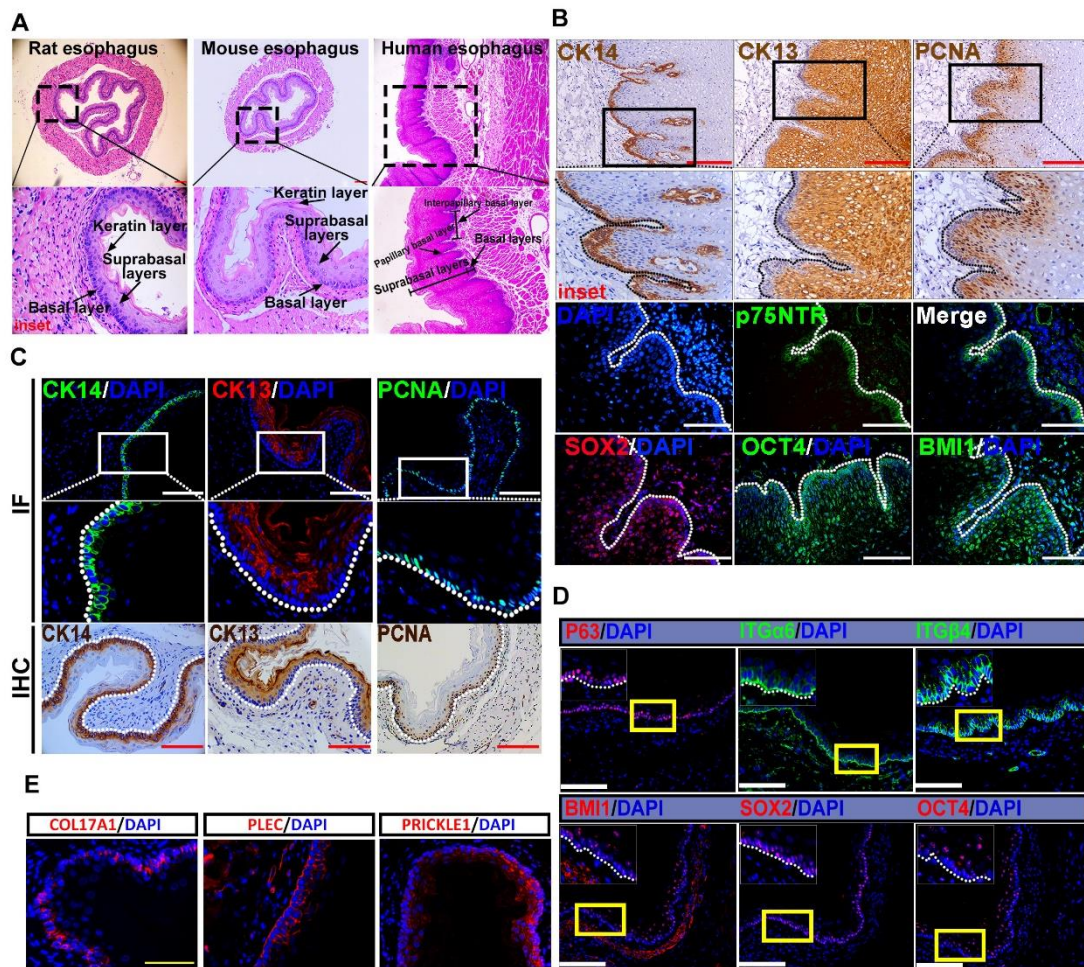

1072

1073 **Figure S1. Characterization of rodent and human esophageal epithelium.**

1074 (A) H&E staining of normal rodent and human esophagus cross-section.

1075 Rodent esophagus with endodermal structures including basal layer,

1076 suprabasal layers and keratin layer. Human esophagus with endodermal

1077 structures including suprabasal layers, papillary and interpapillary basal layer.

1078 (B) Immunostaining of CK14, CK13, PCNA, P75, SOX2, OCT4 and BMI1 of

1079 human esophageal sections. (C) Immunostaining of CK14, CK13, PCNA, (D)

1080 P63, ITG $\alpha$ 6, ITG $\beta$ 4, BMI1, SOX2, OCT4 and (E) COL17A1, PLEC and

1081 PRICKLE1 of rat esophageal tissue sections. Dotted line marks the basement

1082 membrane. Scale bars: 100µm.

1083

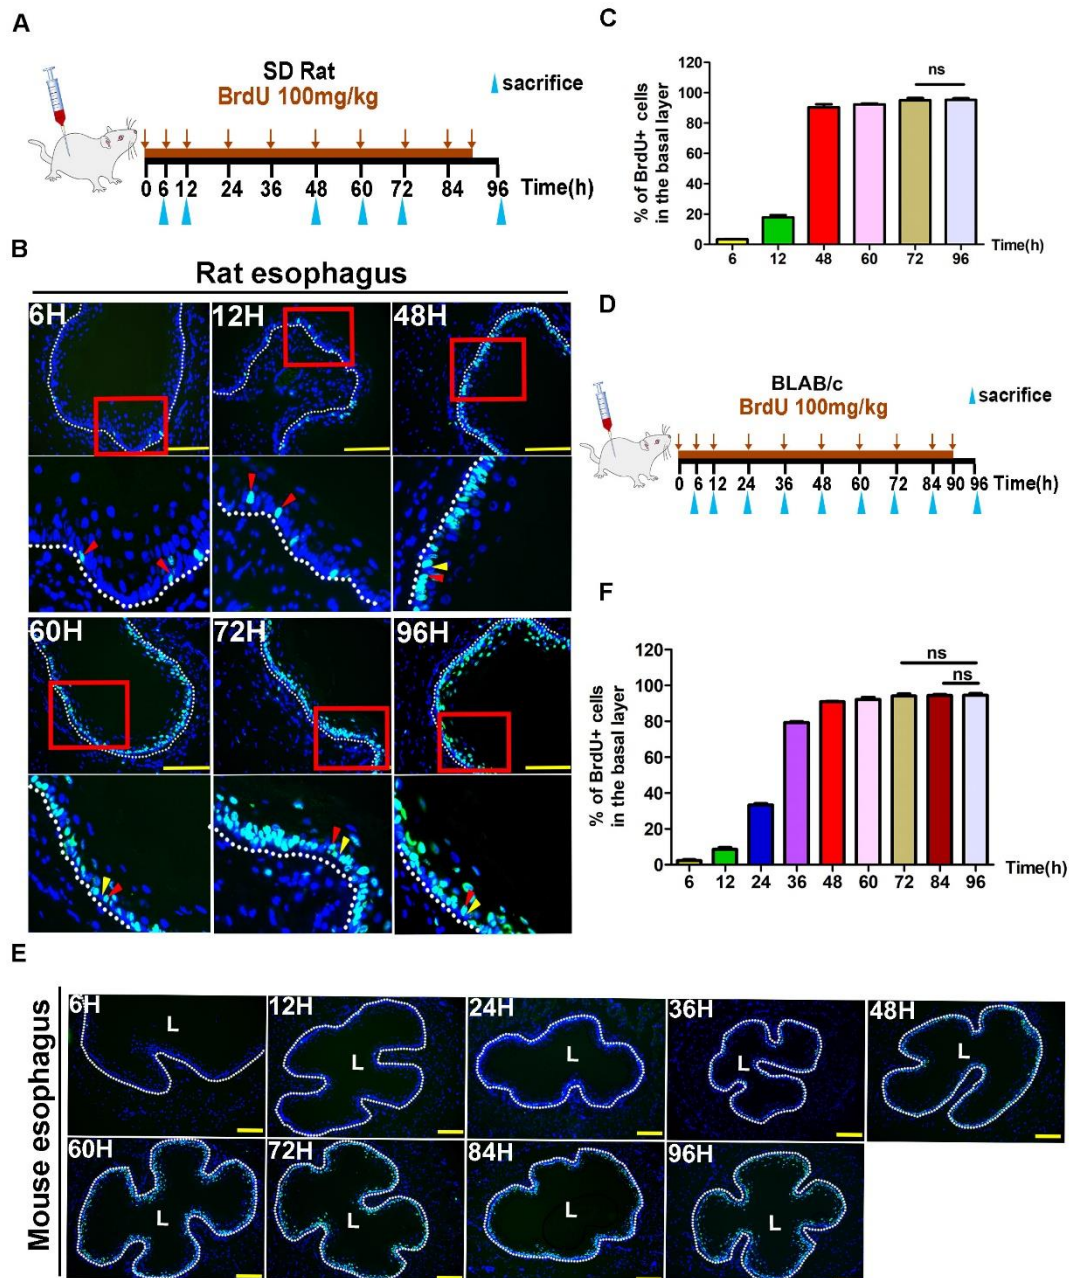

1084

1085 **Figure S2. Rodent esophageal basal layer exists a small relatively slow**

1086 **cycling/quiescent cell population. (A) Schematic illustration of BrdU-labeling**

1087 **experiment of SD rats. SD rats were injected with BrdU of 100 mg/kg body**

1088 **weight once per 6 hours for 96 consecutive hours and sacrificed at five different**

1089 time points. (B) Immunofluorescence staining of BrdU (green) of rat esophageal  
1090 sections at listed time points counterstained with DAPI (blue). Red triangle  
1091 arrows indicate BrdU+ cells; the yellows indicate BrdU- cells. (C) The  
1092 percentage of BrdU+ cells in the basal layer of rat esophageal epithelium at  
1093 listed time points. (n=5, n represents 5 intact basal layers of esophageal  
1094 epithelium counted at each time point). (D) Schematic illustration of BrdU-  
1095 labeling experiment of BLAB/C mice. BLAB/C mice were injected with BrdU of  
1096 100 mg/kg body weight once per 6 hours for 96 consecutive hours and  
1097 sacrificed at nine different time points. (E) Immunofluorescence staining of  
1098 BrdU (green) of mouse esophageal sections at listed time points counterstained  
1099 with DAPI (blue). (F) The percentage of BrdU+ cells in the basal layer of mouse  
1100 esophageal epithelium at listed time points. (n=5, n represents 5 intact basal  
1101 layers of esophageal epithelium counted at each time point) Data are  
1102 represented as the mean +/- SD for percent analysis (\*p < 0.05, \*\*p < 0.01,  
1103 \*\*\*p < 0.001). "L" indicates the lumen; dotted line marks the basement  
1104 membrane. Scale bars: 100µm.

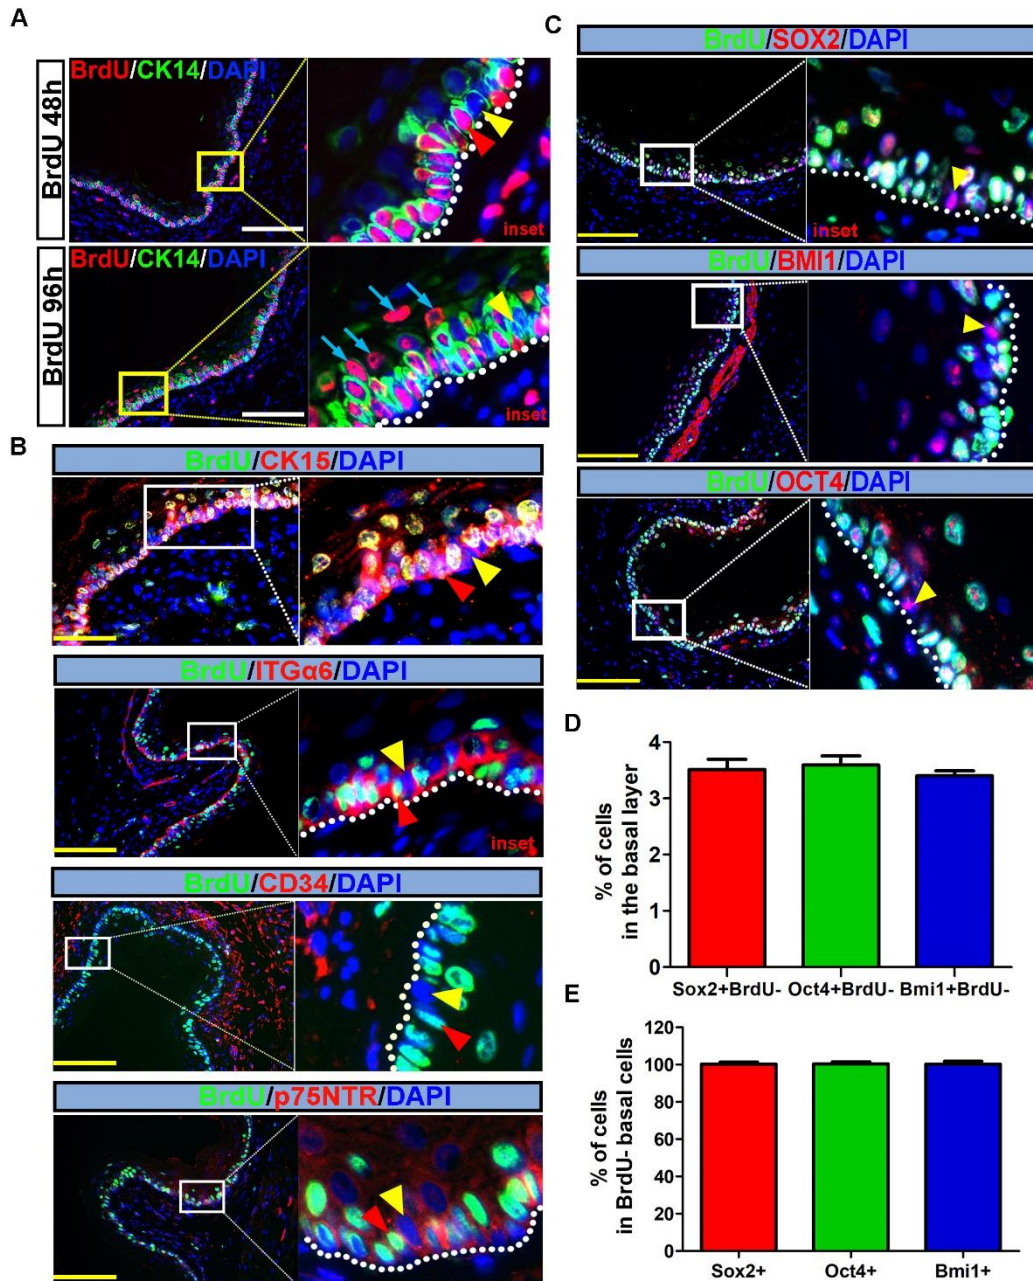

1105

1106 **Figure S3. Rat esophageal slow cycling/quiescent basal cells co-**  
1107 **immunostaining with stemness markers. (A)** CK14 (green) and BrdU (red)  
1108 co-immunostaining of rat primary esophageal tissue section counterstained  
1109 with DAPI (blue). BrdU+ and BrdU- basal cells both expressed CK14 at BrdU-  
1110 labelling 48 hours and 96 hours. (B) Colocalization of BrdU (green) with  
1111 potential esophageal stemness markers CK15 (red), ITGa6 (red), CD34 (red)



1112 and P75NTR (red), respectively of the rat esophagus sections of BrdU 96h. (C)  
1113 Colocalization of BrdU (green) with stemness-related markers SOX2 (red),  
1114 BMI1 (red) and OCT4(red), respectively of the rat esophagus sections of BrdU  
1115 96h. (D) The percentage of SOX2+BrdU- cells, BMI1+BrdU- cells and  
1116 OCT4+BrdU- cells in the basal layer cells that calculated of co-immunostaining  
1117 were ~4%, which were consistent with the percentage of BrdU- cells. (n=3). (E)  
1118 The percentage of SOX2+ cells, BMI1+ cells and OCT4+ cells of BrdU- basal  
1119 layer cells were almost 100% by manual counting (n=3). Insets panels  
1120 represents magnification of regions of interest displayed by white or yellow  
1121 rectangles. Yellow triangle arrows indicate BrdU- cells; the reds indicate BrdU+  
1122 cells. Dotted line marks the basement membrane. Scale bars: 100  $\mu$ m. Data  
1123 are represented as the mean +/- SD for percent analysis (\*p < 0.05, \*\*p < 0.01,  
1124 \*\*\*p < 0.001).

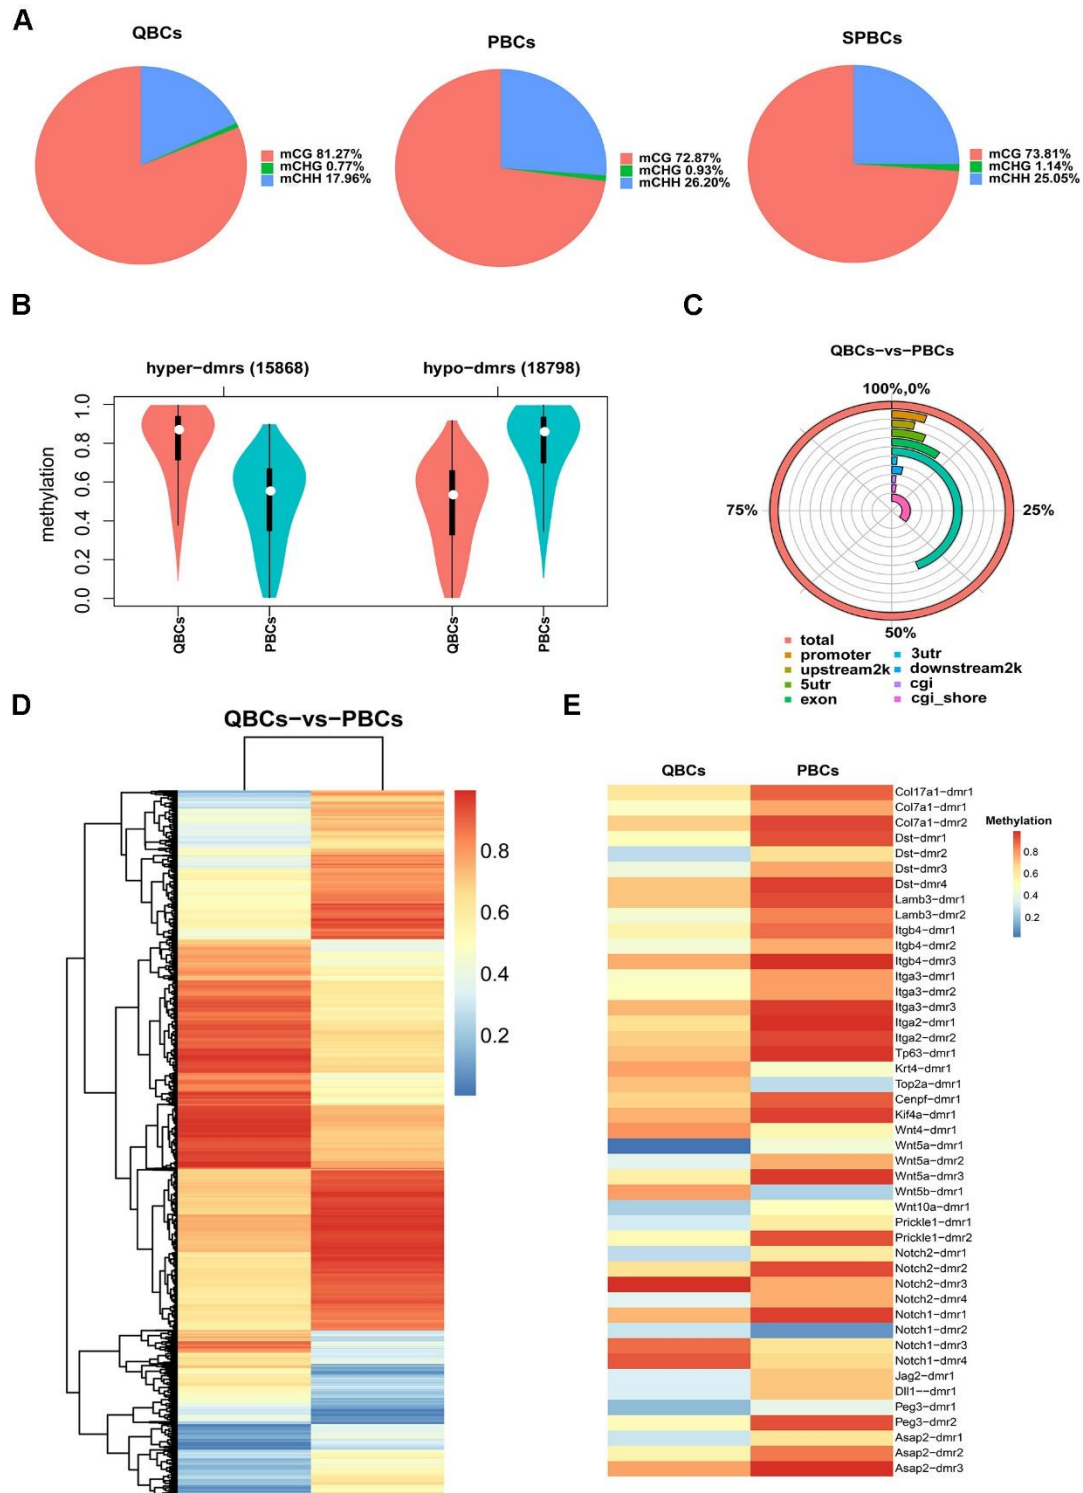

1125

1126 **Figure S4. Differential methylation analysis among QBCs, PBCs and**

1127 **SPBCs.** (A) Distribution map of methylated C sites of each population. Different

1128 colors represent methylated C sites in different contexts, and the size of each

1129 area represents the proportion of methylated C sites in the corresponding

1130 context. (B) DMR average methylation level distribution violin plot between  
1131 QBCs and PBCs. DMR represent the differentially methylated regions. Hyper-  
1132 dmrs represent the dmrs that are hypermethylated, and hypo-dmrs represent  
1133 the dmrs that are hypomethylated. (C) Genomic functional element methylation  
1134 map between QBCs and PBCs. (D) DMR methylation level clustering heat map  
1135 between QBCs and PBCs. (E) DMR methylation level heat map of  
1136 representative genes between QBCs and PBCs.

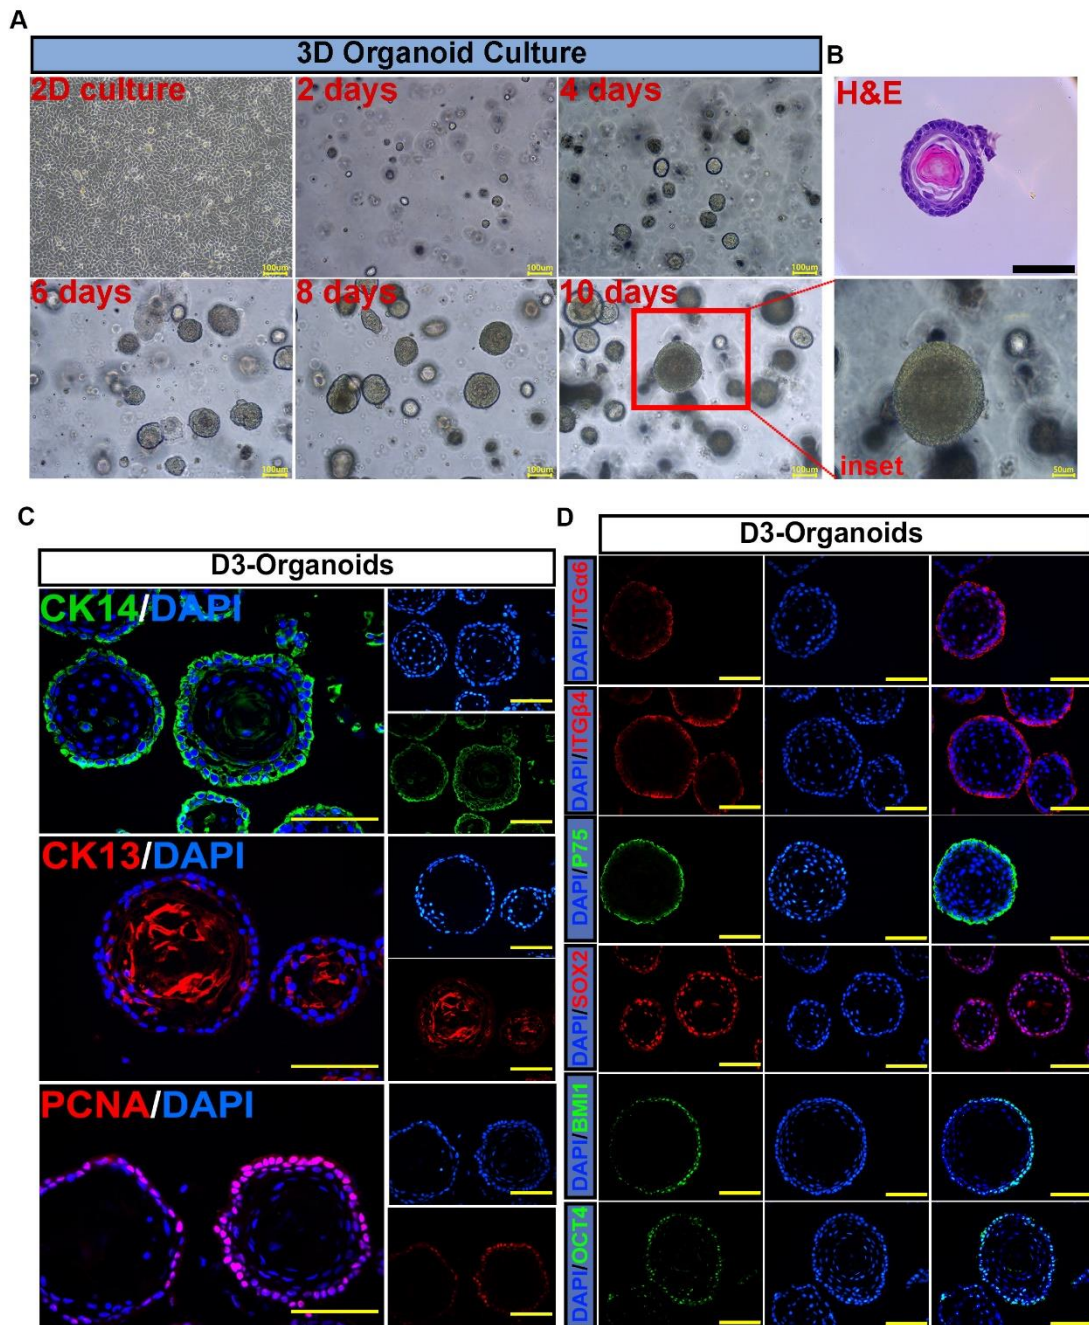

1137

1138 **Figure S5. Characterization of rat esophageal organoids derived from**

1139 **immortalized normal rat esophageal keratinocyte cell line D3. (A) The**

1140 **expanding course of Immortalized normal rat esophageal keratinocyte cell line**

1141 **D3 cells with conditional culture to form normal and typical esophageal**

1142 **organoids. D3 cells in 2D culture were enzymatically dissociated and filtrated**

1143 **to prepare single-cell suspensions with Matrigel to initiate organoid culture in**

1144 10 days. Scale bars: 100 $\mu$ m. Inset showed the representative image of a normal  
1145 and typical rat esophageal organoid derived from D3 cells (D3-organoid) in  
1146 bright field. Scale bars: 50 $\mu$ m. (B) The representative image of H&E staining of  
1147 D3-organoid. Scale bars: 100 $\mu$ m. (C) Immunofluorescence staining of CK14  
1148 (green), CK13 (red) and PCNA (red) counterstained with DAPI (blue) of D3-  
1149 organoids. Scale bars: 100 $\mu$ m. (D) Immunofluorescence staining of esophageal  
1150 stemness makers, ITG $\alpha$ 6, ITG $\beta$ 4, P75, SOX2, OCT4 and BMI1 of D3-organoids.  
1151 Nucleus were counterstained with DAPI (blue). Scale bars: 100 $\mu$ m.

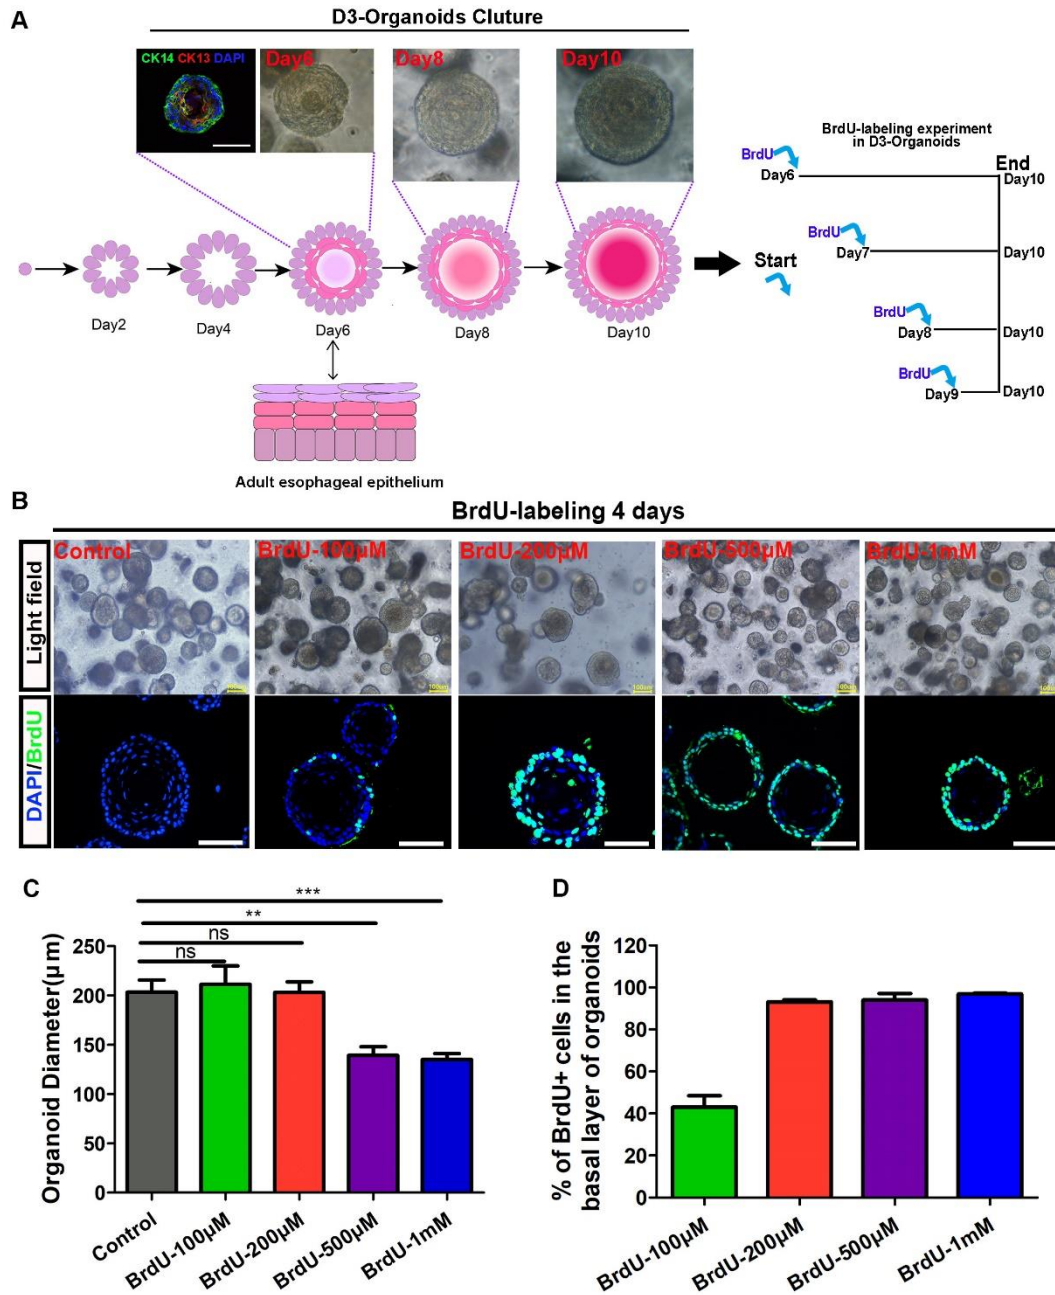

1152

1153 **Figure S6. BrdU-labeling experiment of rat esophageal organoids derived**

1154 **from immortalized normal rat esophageal keratinocyte cell line D3. (A)**

1155 **Schematic illustration of BrdU-labeling experiment of rat esophageal organoids**

1156 **derived from D3. (B) The growth of D3-organoids was observed under different**

1157 **BrdU concentrations and immunofluorescence staining of BrdU was performed.**

1158 **(C) The diameters of D3-organoids were calculated under different BrdU**

1159 concentrations. (n=5, n presents five random microscope fields,200x). (D) The  
1160 percentage of BrdU+ cells in the basal layer of D3- organoids under different  
1161 BrdU concentrations. (n=8, n presents eight random microscope fields,400x).  
1162 Scale bars:100µm. Data are represented as the mean +/- SD for percent  
1163 analysis (\*p <0.05, \*\*p < 0.01, \*\*\*p < 0.001).

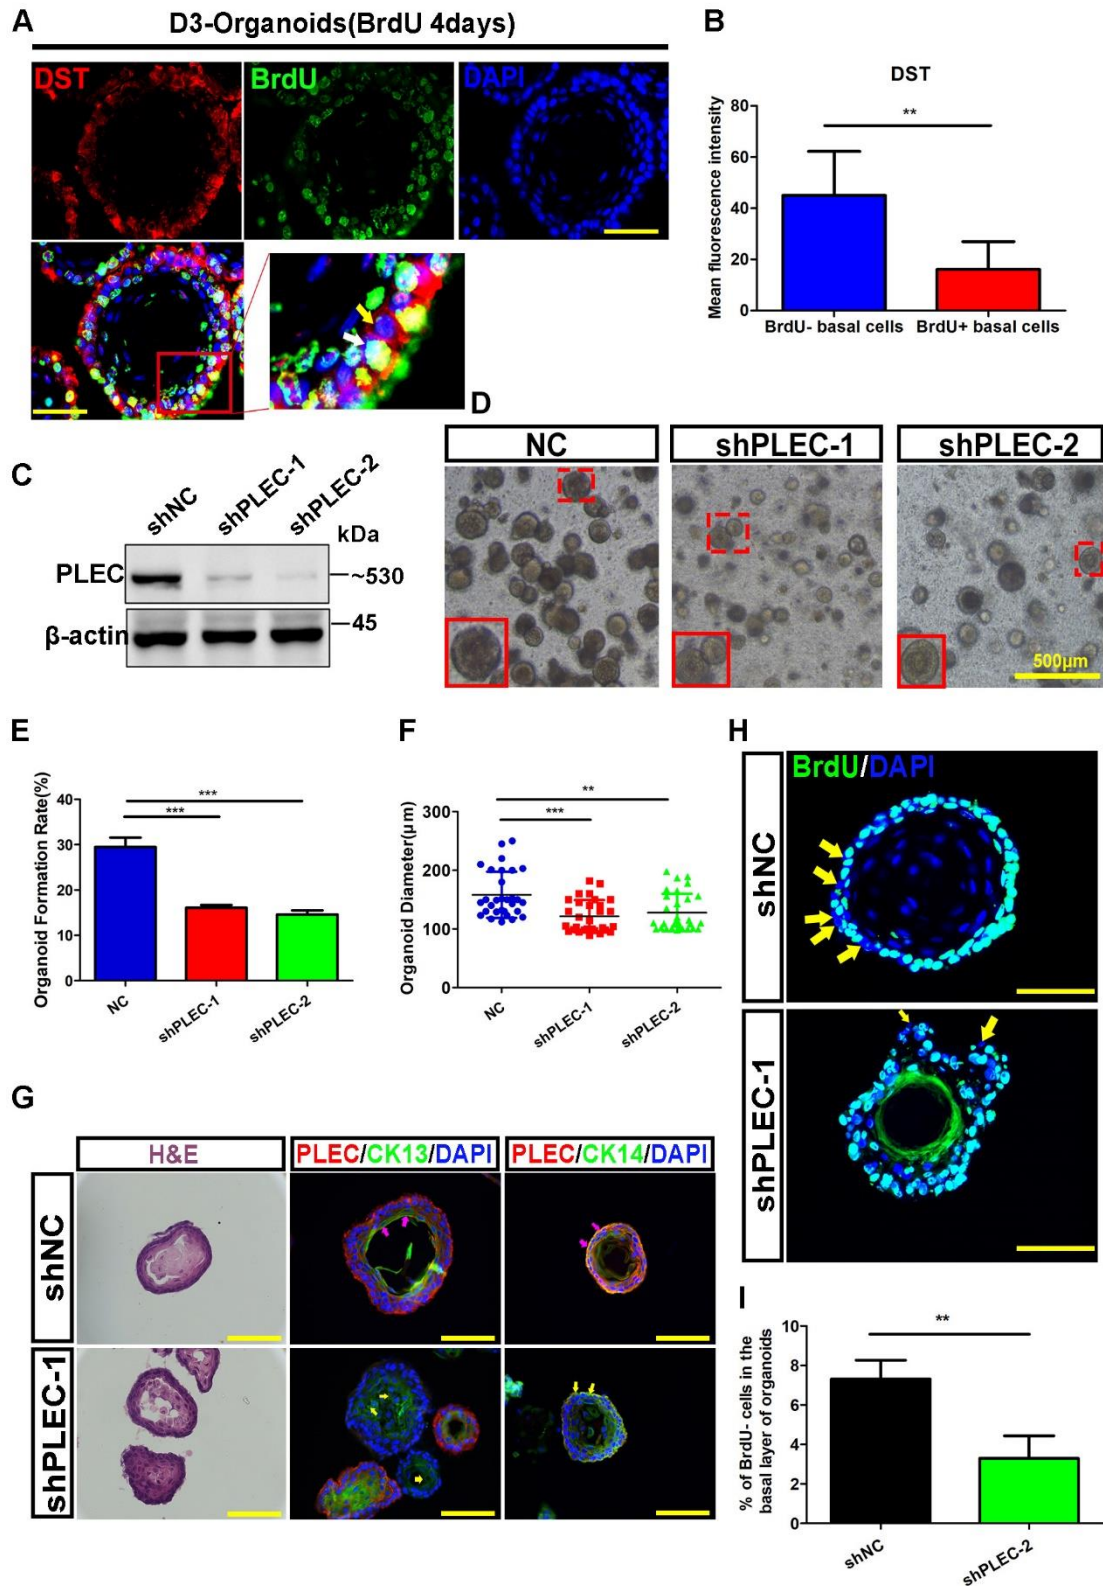

1164

1165 **Figure S7. Hemidesmosome (HD) components in stem cell maintenance**

1166 **and proliferation-differentiation homeostasis of rat esophagus and**

1167 **organoids. (A) BrdU- basal cells had higher expression of DST expression**



1168 than BrdU+ basal cells by immunofluorescence staining in D3 organoids. Scale  
1169 bars:100 $\mu$ m. (B) The mean fluorescence intensity of DST expression was  
1170 counted corresponds to (A). (C) Western Blotting verification of D3-shPLEC cell  
1171 line construction. (D) The representative images of light field of organoids at  
1172 day 10. PLEC knockdown significantly inhibited organoid formation and growth.  
1173 Scale bars: 500 $\mu$ m. (E) Quantification of organoid formation rate after PLEC  
1174 knockdown. (F) Quantification of organoid diameter after PLEC knockdown. (G)  
1175 H&E staining and immunofluorescence staining of intermediate filaments  
1176 (CK13 and CK14) of organoids showed significant self-organization  
1177 perturbation presented as uneven basal layers and abnormal distribution of  
1178 CKs after PLEC knockdown. (H) Immunofluorescence staining of BrdU of D3-  
1179 organoids labeled for 4 days after PLEC knockdown. The yellow arrows  
1180 indicated the BrdU- cells. Scale bars: 100 $\mu$ m. (I)The percentage of BrdU- cells  
1181 in the basal layer of D3-organoids after PLEC knockdown. (n=6, n presents six  
1182 random microscope fields,200X). Data are represented as the mean +/- SD for  
1183 percent analysis (\*p < 0.05, \*\*p < 0.01, \*\*\*p< 0.001).

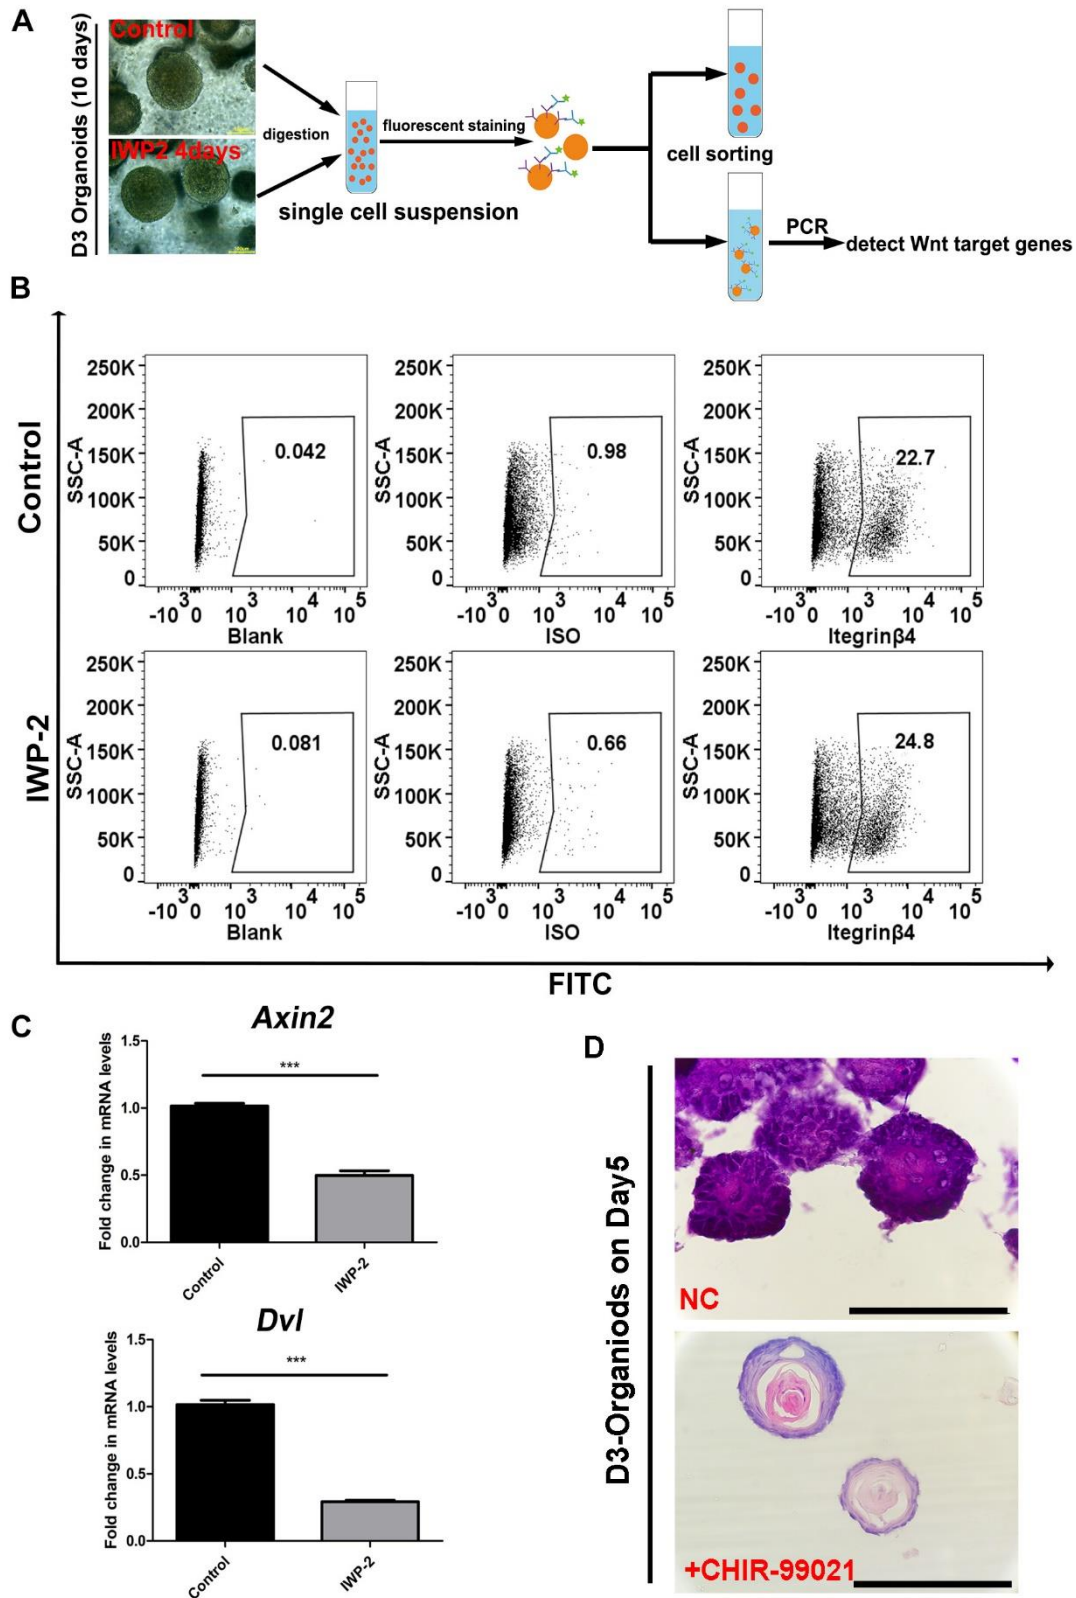

1184

1185 **Figure S8. Wnt inhibition in rat esophageal organoids.** (A) Experimental

1186 procedure for obtaining basal cells from organoids Scale bars: 100µm. (B)

1187 ITGβ4+ basal cells were sorted from D3- organoids by flow cytometry. (C) The

1188 mRNA expression of Wnt downstream target genes in the groups with Wnt  
1189 inhibitor IWP-2 and control. (D) The D3-Organoids on day5 showed higher  
1190 degree of differentiation treated with Wnt activator CHIR-99021. Scale  
1191 bars:100 $\mu$ m.
